# Supplementary material for: Evolution of a multifunctional trait: shared effects of foraging ecology and thermoregulation on beak morphology, with consequences for song evolution
Source: Proc Biol Sci. 2019 Dec 18;286(1917):20192474. doi: 10.1098/rspb.2019.2474 (PMC6939928; doi:10.1098/rspb.2019.2474)
Supplement: Appendix S2: Song Recordings [file rspb20192474supp3.csv]

Collection	Species	ID	Recordist	Date	Locality	Latitude	Longitude
Australian National Wildlife Collection - CSIRO	Ramsayornis fasciatus	X00967	Powys, V.	1993/08/25	Koolpin Gorge, Kakadu NP, NT	-13.4935	132.5857
Australian National Wildlife Collection - CSIRO	Ptilotula plumula	X04570	Stewart, D.	1982/08/08	Gorge Creek 25kms East Mount Isa	-20.75	139.6333
Australian National Wildlife Collection - CSIRO	Ptilotula plumula	X04578	Stewart, D.	1982/08/08	Gorge Creek 25kms East Mount Isa	-20.75	139.6333
Australian National Wildlife Collection - CSIRO	Bolemoreus hindwoodi	X04748	Stewart, D.	1983/04/17	Dalrymple Road Eungella National Park	-21.05	148.6
Australian National Wildlife Collection - CSIRO	Epthianura tricolor	X04819	Stewart, D.	1983/08/31	22kms North Tibooburra	-29.3	142.0333
Australian National Wildlife Collection - CSIRO	Lichenostomus cratitius	X04912	Stewart, D.	1983/09/18	1km South Comet Bore	-35.85	140.8667
Australian National Wildlife Collection - CSIRO	Anthochaera lunulata	X04991	Stewart, D.	1984/04/01	Kathleen Drive via Corindi	-29.95	153.1167
Australian National Wildlife Collection - CSIRO	Melithreptus validirostris	X05003	Stewart, D.	1984/05/14	Collins Cap Road Collins Cap	-42.8833	147.15
Australian National Wildlife Collection - CSIRO	Melithreptus affinis	X05024	Stewart, D.	1984/05/15	Barnes Bay North Bruny Island	-43.1167	147.3667
Australian National Wildlife Collection - CSIRO	Melithreptus validirostris	X05053	Stewart, D.	1984/05/18	3kms West Adventure Bay South Bruny Island	-43.3667	147.3167
Australian National Wildlife Collection - CSIRO	Melithreptus validirostris	X05054	Stewart, D.	1984/05/18	Hastings Caves	-43.3833	146.8333
Australian National Wildlife Collection - CSIRO	Ramsayornis fasciatus	X05383	Stewart, D.	1984/09/17	Hann River	-15.1833	143.8667
Australian National Wildlife Collection - CSIRO	Stomiopera flava	X05386	Stewart, D.	1984/09/17	Hann River	-15.1833	143.8667
Australian National Wildlife Collection - CSIRO	Ramsayornis fasciatus	X05388	Stewart, D.	1984/09/17	Hann River	-15.1833	143.8667
Australian National Wildlife Collection - CSIRO	Ashbyia lovensis	X05808	Stewart, D.	1985/09/24	4kms West Oakdale Station	-32.2667	141.2167
Australian National Wildlife Collection - CSIRO	Ptilotula flavescens	X05892	Stewart, D.	1986/06/25	Lawn Hill Gorge National Park Camping Area	-18.7167	138.4667
Australian National Wildlife Collection - CSIRO	Conopophila rufogularis	X05964	Stewart, D.	1986/06/30	5kms South Bing Bong Station	-15.6667	136.3333
Australian National Wildlife Collection - CSIRO	Anthochaera lunulata	X06035	Stewart, D.	1986/08/26	Woody Head via Iluka	-29.35	153.8667
Australian National Wildlife Collection - CSIRO	Ashbyia lovensis	X06237	Stewart, D.	1987/05/30	Nails Creek 50kms North West Davenport Downs Station	-24.0167	140.6667
Australian National Wildlife Collection - CSIRO	Anthochaera lunulata	X06497	Stewart, D.	1988/09/09	Nemarotu, Wilsons Creek via Mullumbimby	-28.5667	153.4
Australian National Wildlife Collection - CSIRO	Epthianura tricolor	X06589	Stewart, D.	1988/06/18	Nails Creek 50kms North West Davenport Downs Station	-24.0167	140.6667
Australian National Wildlife Collection - CSIRO	Myzomela erythrocephala	X06975	Stewart, D.	1989/09/03	Channel Island Palmerston	-12.4833	130.9167
Macaulay Library - Cornell Lab of Ornithology	Meliphaga notata	202041	Greig, Emma I	2012/09/23	Cape York; Umagico	-10.87181	142.36025
Macaulay Library - Cornell Lab of Ornithology	Prosthemadera novaeseelandiae	136121	Medler, Matthew D	2004/04/24	Pongakawa Ecological Reserve; Hannons Rd.	-37.971601	176.540789
Macaulay Library - Cornell Lab of Ornithology	Anthornis melanura	136111	Medler, Matthew D	2004/04/12	Te Urewera National Park; Tawai Ridge Track	-38.339774	177.143426
Macaulay Library - Cornell Lab of Ornithology	Anthornis melanura	136106	Medler, Matthew D	2004/04/12	Te Urewera National Park; Tawai Ridge Track	-38.339774	177.143426
Macaulay Library - Cornell Lab of Ornithology	Prosthemadera novaeseelandiae	136096	Medler, Matthew D	2004/04/06	Pongakawa Ecological Reserve; Kokako Rd.	-37.972897	176.518064
Macaulay Library - Cornell Lab of Ornithology	Anthornis melanura	136045	Medler, Matthew D	2004/03/13	Tiritiri Matangi	-36.60046	174.890014
Macaulay Library - Cornell Lab of Ornithology	Prosthemadera novaeseelandiae	136003	Medler, Matthew D	2004/03/03	Stewart Island; Rakiura National Park; Rakiura Track; west of Wooding Bay	-46.85447	168.063
Macaulay Library - Cornell Lab of Ornithology	Melithreptus albogularis	201296	Greig, Emma I	2012/09/20	Cape York; Jardine RIver	-11.14892	142.35258
Macaulay Library - Cornell Lab of Ornithology	Ramsayornis modestus	201296	Greig, Emma I	2012/09/20	Cape York; Jardine RIver	-11.14892	142.35258
Macaulay Library - Cornell Lab of Ornithology	Entomyzon cyanotis	201294	Greig, Emma I	2012/09/20	Cape York; Jardine RIver	-11.14892	142.35258
Macaulay Library - Cornell Lab of Ornithology	Ramsayornis modestus	201256	Greig, Emma I	2012/09/13	Cape York; Iron Range	-12.79622	143.32764
Macaulay Library - Cornell Lab of Ornithology	Philemon buceroides	200535	Greig, Emma I	2012/09/27	Cape York; Prince of Wales Island	-10.71328	142.11889
Macaulay Library - Cornell Lab of Ornithology	Myzomela obscura	200533	Greig, Emma I	2012/09/27	Cape York; Prince of Wales Island	-10.71328	142.11889
Macaulay Library - Cornell Lab of Ornithology	Meliphaga notata	200510	Greig, Emma I	2012/09/25	Cape York; Umagico	-10.87222	142.35964
Macaulay Library - Cornell Lab of Ornithology	Lichmera incana	188748	DeCicco, Lucas	2009/12/01	South Province; Blue River National Park	-22.094392	166.664156
Macaulay Library - Cornell Lab of Ornithology	Foulehaio carunculatus	181342	Andersen, Michael J	2011/07/12	Lau Archipelago; Ogea Levu	-19.15165	-178.41005
Macaulay Library - Cornell Lab of Ornithology	Foulehaio taviuensis	181166	Andersen, Michael J	2010/07/03	Vanua Levu; Waisali Rainforest Reserve	-16.6366667	179.2116667
Macaulay Library - Cornell Lab of Ornithology	Caligavis chrysops	173610	Mathers-Winn, Cedar A	2012/11/08	Kalunga; Kalinvale Farm & Donkey Depot	-17.4448333	145.3725167
Macaulay Library - Cornell Lab of Ornithology	Prosthemadera novaeseelandiae	171696	Hill, Samuel	2013/01/21	Hauraki Gulf; Tiritiri Matangi Island; Wharf Road	-36.6057	174.893
Macaulay Library - Cornell Lab of Ornithology	Lichmera indistincta	164332	Clock, Benjamin M	2012/09/04	Piccaninny Plains fig tree camp	-13.210004	142.614246
Macaulay Library - Cornell Lab of Ornithology	Melithreptus albogularis	164330	Clock, Benjamin M	2012/09/04	Piccaninny Plains fig tree camp	-13.210004	142.614246
Macaulay Library - Cornell Lab of Ornithology	Myzomela rubratra	139992	Pratt, H. Douglas	2007/04/06	4.5 km S of Kolonia, Nanpil Valley	6.920068	158.204872
Macaulay Library - Cornell Lab of Ornithology	Foulehaio carunculatus	139893	Pratt, H. Douglas	2006/11/25	4.0 km SE of Aopo Village	-13.57672	-172.508821
Macaulay Library - Cornell Lab of Ornithology	Foulehaio carunculatus	139815	Pratt, H. Douglas	2006/11/15	E of Leone Village	-14.341108	-170.780424
Macaulay Library - Cornell Lab of Ornithology	Foulehaio carunculatus	139801	Pratt, H. Douglas	2006/11/13	E of National Park of American Samoa	-14.281252	-170.713916
Macaulay Library - Cornell Lab of Ornithology	Myzomela jugularis	139700	Pratt, H. Douglas	2005/11/10	Taveuni; Des Voeux Peak Road, Mt. Uluigalau	-16.94021	179.9698
Macaulay Library - Cornell Lab of Ornithology	Melidectes ochromelas	139526	Beehler, Bruce M	2005/12/01	Foja Mts, Bog Camp	-2.5727778	138.7172222
Macaulay Library - Cornell Lab of Ornithology	Prosthemadera novaeseelandiae	136144	Medler, Matthew D	2004/04/25	Pongakawa Ecological Reserve; Hannons Rd.	-37.971601	176.540789
Macaulay Library - Cornell Lab of Ornithology	Prosthemadera novaeseelandiae	136120	Medler, Matthew D	2004/04/24	Pongakawa Ecological Reserve; Hannons Rd.	-37.971601	176.540789
Macaulay Library - Cornell Lab of Ornithology	Prosthemadera novaeseelandiae	136117	Medler, Matthew D	2004/04/18	Pongakawa Ecological Reserve; Hannons Rd.	-37.971601	176.540789
Macaulay Library - Cornell Lab of Ornithology	Prosthemadera novaeseelandiae	136115	Medler, Matthew D	2004/04/18	Pongakawa Ecological Reserve; Hannons Rd.	-37.971601	176.540789
Macaulay Library - Cornell Lab of Ornithology	Anthornis melanura	136109	Medler, Matthew D	2004/04/12	Te Urewera National Park; Tawai Ridge Track	-38.339774	177.143426
Macaulay Library - Cornell Lab of Ornithology	Prosthemadera novaeseelandiae	136090	Medler, Matthew D	2004/04/06	Pongakawa Ecological Reserve; Pukehangi Rd. and Hannons Rd.	-37.962367	176.543217
Macaulay Library - Cornell Lab of Ornithology	Anthornis melanura	136088	Medler, Matthew D	2004/04/05	Pongakawa Ecological Reserve; Hannons Rd.	-37.971601	176.540789
Macaulay Library - Cornell Lab of Ornithology	Anthornis melanura	136073	Medler, Matthew D	2004/03/27	Pongakawa Ecological Reserve; Kokako Rd.	-37.972897	176.518064
Macaulay Library - Cornell Lab of Ornithology	Anthornis melanura	136071	Medler, Matthew D	2004/03/27	Pongakawa Ecological Reserve; Kokako Rd.	-37.972897	176.518064
Macaulay Library - Cornell Lab of Ornithology	Anthornis melanura	136067	Medler, Matthew D	2004/03/21	Pongakawa Ecological Reserve; Kokako Rd.	-37.972913	176.519889
Macaulay Library - Cornell Lab of Ornithology	Anthornis melanura	136002	Medler, Matthew D	2004/03/03	Stewart Island; Rakiura National Park; Rakiura Track; west of Wooding Bay	-46.85447	168.063
Macaulay Library - Cornell Lab of Ornithology	Philemon corniculatus	128363	Macaulay, Linda R	2005/10/13	Alpine National Park	NA	NA
Macaulay Library - Cornell Lab of Ornithology	Ptilotula fusca	125916	Macaulay, Linda R	NA	Castlemaine-ruins of Gower School	NA	NA
Macaulay Library - Cornell Lab of Ornithology	Myzomela rosenbergii	100642	Mack, Andrew L	1999/02/01	6.0 km SE of Maimafu Airstrip; Maimafu Camp, Near Summit Crater Mountain	-6.5344444	145.0669444
Macaulay Library - Cornell Lab of Ornithology	Anthornis melanura	71629	Connop, Scott	1993/12/15	North Island; Pongakawa Valley Forest	NA	NA
Macaulay Library - Cornell Lab of Ornithology	Meliphaga lewinii	48495	Katz, Mary	1987/09/25	Toowoomba	NA	NA
Macaulay Library - Cornell Lab of Ornithology	Melidectes belfordi	22769	Pratt, Thane K	1974/12/20	near Wau. 2500m.	-7.3401754	146.6666667
Macaulay Library - Cornell Lab of Ornithology	Melidectes fuscus	22740	Pratt, Thane K	1974/11/10	Wau.	-7.5	146.6666667
Macaulay Library - Cornell Lab of Ornithology	Melidectes belfordi	22720	Pratt, Thane K	1974/09/21	Wau. Mt. Mission.	-7.25	146.8333333
Macaulay Library - Cornell Lab of Ornithology	Myzomela rosenbergii	22718	Pratt, Thane K	1974/09/19	Wau. Mt. Mission.	-7.25	146.8333333
Macaulay Library - Cornell Lab of Ornithology	Myzomela sanguinolenta	14961	Loetscher, Jr., Fred W	1968/12/05	Lamington National Park	-28.2333333	153.0833333
Macaulay Library - Cornell Lab of Ornithology	Melithreptus brevirostris	14959	Loetscher, Jr., Fred W	1969/04/04	19.2 km E of Narrogin	-32.9333333	117.3
Macaulay Library - Cornell Lab of Ornithology	Meliphaga notata	14956	Loetscher, Jr., Fred W	1969/02/07	E of Innisfail	-17.5833333	146.0333333
Macaulay Library - Cornell Lab of Ornithology	Anthornis melanura	14947	Ward, William V	1970/10/21	Coronation Forest; Spooner's Range	-41.4666667	172.9
Macaulay Library - Cornell Lab of Ornithology	Acanthorhynchus superciliosus	14935	Loetscher, Jr., Fred W	1969/04/10	John Forrest Nat. Park; 20.8km Ene P	-31.9666667	115.9333333
Macaulay Library - Cornell Lab of Ornithology	Anthornis melanura	516551	Heaton Crisologo, Taylor	2015/08/06	Tiritiri Matangi Island	-36.60575	174.8967
Macaulay Library - Cornell Lab of Ornithology	Myzomela cardinalis	515780	Andersen, Michael J	2014/12/06	Gaua Island; East shore Lake Letes	-14.2747	167.5488
Macaulay Library - Cornell Lab of Ornithology	Myzomela cardinalis	515777	Andersen, Michael J	2014/12/06	Gaua Island; East shore Lake Letes	-14.2747	167.5488
Macaulay Library - Cornell Lab of Ornithology	Anthornis melanura	515205	Mathers-Winn, Cedar A	2014/01/08	Trotter's Gorge Scenic Reserve	-45.404133	170.780783
Macaulay Library - Cornell Lab of Ornithology	Lichmera incana	515046	Andersen, Michael J	2014/11/19	?fat? Island; 4.2 km SE Port Havana	-17.6029	168.2827
Macaulay Library - Cornell Lab of Ornithology	Lichmera incana	514951	Andersen, Michael J	2014/11/19	?fat? Island; 4.2 km SE Port Havana	-17.6029	168.2827
Macaulay Library - Cornell Lab of Ornithology	Meliphaga lewinii	206224	Dzielski, Sarah	2015/05/31	Blue Mountains National Park	-33.7217	150.31725
Macaulay Library - Cornell Lab of Ornithology	Acanthorhynchus tenuirostris	206223	Dzielski, Sarah	2015/05/31	Blue Mountains National Park	-33.7217	150.31725
Macaulay Library - Cornell Lab of Ornithology	Myzomela lafargei	202740	Robbins, Mark B	2014/11/06	Shortland Island; Koliai	-7.0419	155.8479
Macaulay Library - Cornell Lab of Ornithology	Ramsayornis modestus	202056	Greig, Emma I	2012/09/24	Cape York; Umagico	-10.87358	142.36125
Macaulay Library - Cornell Lab of Ornithology	Melithreptus albogularis	202055	Greig, Emma I	2012/09/24	Cape York; Umagico	-10.87358	142.36125
Macaulay Library - Cornell Lab of Ornithology	Ramsayornis modestus	202054	Greig, Emma I	2012/09/24	Cape York; Umagico	-10.87358	142.36125
Macaulay Library - Cornell Lab of Ornithology	Meliphaga notata	202048	Greig, Emma I	2012/09/23	Cape York; Umagico	-10.87181	142.36025
Macaulay Library - Cornell Lab of Ornithology	Myzomela obscura	202046	Greig, Emma I	2012/09/23	Cape York; Umagico	-10.87181	142.36025
Macaulay Library - Cornell Lab of Ornithology	Melithreptus albogularis	201295	Greig, Emma I	2012/09/20	Cape York; Jardine RIver	-11.14892	142.35258
Macaulay Library - Cornell Lab of Ornithology	Myzomela obscura	201293	Greig, Emma I	2012/09/20	Cape York; Jardine RIver	-11.14922	142.35281
Macaulay Library - Cornell Lab of Ornithology	Ramsayornis modestus	201248	Greig, Emma I	2012/09/12	Cape York; Iron Range	-12.79458	143.302
Macaulay Library - Cornell Lab of Ornithology	Myzomela obscura	201235	Greig, Emma I	2012/09/11	Cape York; Iron Range	-12.71358	143.28717
Macaulay Library - Cornell Lab of Ornithology	Philemon corniculatus	201207	Greig, Emma I	2012/09/09	Cape York; Steve Irwin Wildlife Reserve	-12.38217	142.17453
Macaulay Library - Cornell Lab of Ornithology	Gavicalis versicolor	201201	Greig, Emma I	2012/10/01	Cape York; Mount Adolphus	-10.64953	142.64583
Macaulay Library - Cornell Lab of Ornithology	Lichmera indistincta	200570	Greig, Emma I	2012/09/29	Cape York; Getullai Island	-10.18375	142.50325
Macaulay Library - Cornell Lab of Ornithology	Ramsayornis modestus	200557	Greig, Emma I	2012/09/29	Cape York; Moa Island	-10.14008	142.21492
Macaulay Library - Cornell Lab of Ornithology	Meliphaga notata	200542	Greig, Emma I	2012/09/27	Cape York; Prince of Wales Island	-10.71656	142.121
Macaulay Library - Cornell Lab of Ornithology	Myzomela erythrocephala	200531	Greig, Emma I	2012/09/26	Cape York; Crab Island	-10.99064	142.11414
Macaulay Library - Cornell Lab of Ornithology	Myzomela erythrocephala	200530	Greig, Emma I	2012/09/26	Cape York; Crab Island	-10.99064	142.11414
Macaulay Library - Cornell Lab of Ornithology	Ramsayornis modestus	200515	Greig, Emma I	2012/09/25	Cape York; Umagico	-10.87344	142.36219
Macaulay Library - Cornell Lab of Ornithology	Ramsayornis modestus	200513	Greig, Emma I	2012/09/25	Cape York; Umagico	-10.87344	142.36219
Macaulay Library - Cornell Lab of Ornithology	Meliphaga lewinii	193293	McCartt, David A	2008/08/21	Lake Eacham; Lake Circuit Track	-17.2883449	145.6282425
Macaulay Library - Cornell Lab of Ornithology	Myzomela sanguinolenta	189718	McNeill, Roger D	2013/11/03	Cedar Creek; 71 Mayfield Road	-27.351863	152.832308
Macaulay Library - Cornell Lab of Ornithology	Myzomela sanguinolenta	189715	McNeill, Roger D	2013/11/03	Cedar Creek; 71 Mayfield Road	-27.351863	152.832308
Macaulay Library - Cornell Lab of Ornithology	Caligavis chrysops	189075	Mathers-Winn, Cedar A	2013/12/14	Kalinvale Farm & Donkey Depot	-17.4430833	145.3727
Macaulay Library - Cornell Lab of Ornithology	Manorina melanocephala	188943	Mathers-Winn, Cedar A	2013/10/04	D'Aguilar National Park; Red Cedar Flats	-27.304067	152.68245
Macaulay Library - Cornell Lab of Ornithology	Philemon diemenensis	188758	DeCicco, Lucas	2009/12/01	South Province; Blue River National Park	-22.094392	166.664156
Macaulay Library - Cornell Lab of Ornithology	Lichmera incana	188751	DeCicco, Lucas	2009/12/01	South Province; Blue River National Park	-22.094392	166.664156
Macaulay Library - Cornell Lab of Ornithology	Caligavis subfrenata	182801	Freeman, Benjamin G	2012/05/26	YUS Conservation Area	-5.98	146.83
Macaulay Library - Cornell Lab of Ornithology	Melidectes foersteri	182800	Freeman, Benjamin G	2012/05/25	YUS Conservation Area	-5.98	146.83
Macaulay Library - Cornell Lab of Ornithology	Myzomela rosenbergii	182667	Class, Alexandra M	2012/11/03	Mount Karimui	-6.55	144.76
Macaulay Library - Cornell Lab of Ornithology	Meliphaga notata	173736	Greig, Emma I	2012/09/14	Iron Range National Park. Gordon Creek Camp.	-12.71333	143.29858
Macaulay Library - Cornell Lab of Ornithology	Meliphaga notata	173732	Greig, Emma I	2012/09/14	Iron Range National Park	-12.71333	143.29858
Macaulay Library - Cornell Lab of Ornithology	Caligavis chrysops	173623	Mathers-Winn, Cedar A	2012/11/25	Kalunga; Kalinvale Farm & Donkey Depot	NA	NA
Macaulay Library - Cornell Lab of Ornithology	Caligavis chrysops	173618	Mathers-Winn, Cedar A	2012/11/19	Kalunga; Kalinvale Farm & Donkey Depot	-17.4429	145.3726667
Macaulay Library - Cornell Lab of Ornithology	Caligavis chrysops	173611	Mathers-Winn, Cedar A	2012/11/04	Kalunga; Kalinvale Farm & Donkey Depot	-17.4455	145.37315
Macaulay Library - Cornell Lab of Ornithology	Cissomela pectoralis	173611	Mathers-Winn, Cedar A	2012/11/04	Kalunga; Kalinvale Farm & Donkey Depot	-17.4455	145.37315
Macaulay Library - Cornell Lab of Ornithology	Cissomela pectoralis	173609	Mathers-Winn, Cedar A	2012/11/08	Kalunga; Kalinvale Farm & Donkey Depot	-17.4448333	145.3725167
Macaulay Library - Cornell Lab of Ornithology	Melidectes ochromelas	166943	Freeman, Benjamin G	2011/06/12	YUS Conservation Area: 2150 m	NA	NA
Macaulay Library - Cornell Lab of Ornithology	Gymnomyza brunneirostris	166522	Andersen, Michael J	2009/11/18	Monasavu Dam	-17.74399	178.05809
Macaulay Library - Cornell Lab of Ornithology	Foulehaio procerior	166520	Andersen, Michael J	2009/11/17	Monasavu Dam	-17.74399	178.05809
Macaulay Library - Cornell Lab of Ornithology	Meliphaga notata	164318	Clock, Benjamin M	2012/08/31	Running Creek beach	-14.318421	143.740999
Macaulay Library - Cornell Lab of Ornithology	Melidectes ochromelas	147990	Pratt, Thane K	1975/01/28	10.0 km S of Wasu; Bumbu	-6.1666667	147.3333333
Macaulay Library - Cornell Lab of Ornithology	Melidectes ochromelas	147985	Pratt, Thane K	1975/01/18	10.0 km S of Wasu; Bumbu	-6.1666667	147.3333333
Macaulay Library - Cornell Lab of Ornithology	Anthornis melanura	141474	Kerr, Donald J	2000/10/10	Rotoiti Rd. and Pongakawa Rd.; near Lake Rotoiti	-38	176.4833333
Macaulay Library - Cornell Lab of Ornithology	Myzomela cardinalis	140265	Pratt, H. Douglas	NA	N of	NA	NA
Macaulay Library - Cornell Lab of Ornithology	Myzomela rubratra	139968	Pratt, H. Douglas	2007/04/05	5.8 km E of Kolonia, Village Hotel	6.969135	158.265097
Macaulay Library - Cornell Lab of Ornithology	Myzomela rubratra	139967	Pratt, H. Douglas	2007/04/05	5.8 km E of Kolonia, Village Hotel	6.969135	158.265097
Macaulay Library - Cornell Lab of Ornithology	Foulehaio carunculatus	139888	Pratt, H. Douglas	2006/11/24	4.0 km SE of Aopo Village	-13.57672	-172.508821
Macaulay Library - Cornell Lab of Ornithology	Foulehaio carunculatus	139839	Pratt, H. Douglas	2006/11/17	E of	-14.162344	-169.67433
Macaulay Library - Cornell Lab of Ornithology	Myzomela cardinalis	139819	Pratt, H. Douglas	2006/11/15	E of Leone Village	-14.341108	-170.780424
Macaulay Library - Cornell Lab of Ornithology	Foulehaio carunculatus	139811	Pratt, H. Douglas	2006/11/14	E of Leone Village	-14.341108	-170.780424
Macaulay Library - Cornell Lab of Ornithology	Foulehaio carunculatus	139799	Pratt, H. Douglas	2006/11/13	E of National Park of American Samoa	-14.281252	-170.713916
Macaulay Library - Cornell Lab of Ornithology	Myzomela jugularis	139735	Pratt, H. Douglas	2005/11/12	Taveuni; Maravu Plantation Resort	-16.693517	-179.886811
Macaulay Library - Cornell Lab of Ornithology	Gymnomyza viridis	139721	Pratt, H. Douglas	2005/11/13	Taveuni; Des Voeux Peak Road, Mt. Uluigalau	-16.94021	179.9698
Macaulay Library - Cornell Lab of Ornithology	Gymnomyza viridis	139705	Pratt, H. Douglas	2005/11/12	Taveuni; Des Voeux Peak Road, Mt. Uluigalau	-16.94021	179.9698
Macaulay Library - Cornell Lab of Ornithology	Foulehaio taviuensis	139703	Pratt, H. Douglas	2005/11/10	Taveuni; Des Voeux Peak Road, Mt. Uluigalau	-16.94021	179.9698
Macaulay Library - Cornell Lab of Ornithology	Caligavis subfrenata	139655	Beehler, Bruce M	2005/09/08	5.0 km S of Paiela Road	NA	NA
Macaulay Library - Cornell Lab of Ornithology	Melidectes belfordi	139643	Beehler, Bruce M	2005/09/06	5.0 km S of Porgera town	NA	NA
Macaulay Library - Cornell Lab of Ornithology	Melidectes belfordi	139637	Beehler, Bruce M	2005/09/05	5.0 km S of Porgera town	NA	NA
Macaulay Library - Cornell Lab of Ornithology	Caligavis subfrenata	139635	Beehler, Bruce M	2005/09/05	5.0 km S of Porgera town	NA	NA
Macaulay Library - Cornell Lab of Ornithology	Melidectes ochromelas	139632	Beehler, Bruce M	2006/06/23	S of Bog Camp; Foja Mountains	-2.5727778	138.7166667
Macaulay Library - Cornell Lab of Ornithology	Caligavis subfrenata	139595	Beehler, Bruce M	2008/07/26	S of Wasaunon Camp; Saruwaged Mts.	NA	NA
Macaulay Library - Cornell Lab of Ornithology	Philemon buceroides	139503	Beehler, Bruce M	2005/11/21	Kwerba Village environs	-2.673893	138.424992
Macaulay Library - Cornell Lab of Ornithology	Anthornis melanura	136105	Medler, Matthew D	2004/04/12	Te Urewera National Park; Tawai Ridge Track	-38.339774	177.143426
Macaulay Library - Cornell Lab of Ornithology	Anthornis melanura	136104	Medler, Matthew D	2004/04/07	Pongakawa Ecological Reserve; Hinau Rd.	-37.973508	176.532486
Macaulay Library - Cornell Lab of Ornithology	Anthornis melanura	136081	Medler, Matthew D	2004/03/31	Pongakawa Ecological Reserve; Kokako Rd.	-37.972913	176.519889
Macaulay Library - Cornell Lab of Ornithology	Anthornis melanura	136020	Medler, Matthew D	2004/03/12	Tiritiri Matangi	-36.60046	174.890014
Macaulay Library - Cornell Lab of Ornithology	Anthornis melanura	136013	Medler, Matthew D	2004/03/11	Pongakawa Ecological Reserve; Hannons Rd.	-37.971601	176.540789
Macaulay Library - Cornell Lab of Ornithology	Anthornis melanura	136008	Medler, Matthew D	2004/03/10	Pongakawa Ecological Reserve; Hannons Rd.	-37.971601	176.540789
Macaulay Library - Cornell Lab of Ornithology	Anthornis melanura	136007	Medler, Matthew D	2004/03/10	Pongakawa Ecological Reserve; Hannons Rd.	-37.971601	176.540789
Macaulay Library - Cornell Lab of Ornithology	Philemon corniculatus	128365	Macaulay, Linda R	2005/10/13	Alpine National Park	NA	NA
Macaulay Library - Cornell Lab of Ornithology	Grantiella picta	128337	Macaulay, Linda R	2005/10/12	Warby Range State Park	NA	NA
Macaulay Library - Cornell Lab of Ornithology	Acanthagenys rufogularis	128316	Macaulay, Linda R	2005/10/11	Deniliquin	NA	NA
Macaulay Library - Cornell Lab of Ornithology	Nesoptilotis leucotis	125972	Macaulay, Linda R	2005/10/09	Ouyen - Hattah-Kulkyne Park	NA	NA
Macaulay Library - Cornell Lab of Ornithology	Nesoptilotis leucotis	125970	Macaulay, Linda R	2005/10/09	Ouyen - Hattah-Kulkyne Park	NA	NA
Macaulay Library - Cornell Lab of Ornithology	Plectorhyncha lanceolata	125969	Macaulay, Linda R	2005/10/07	Ouyen - Hattah-Kulkyne Park	NA	NA
Macaulay Library - Cornell Lab of Ornithology	Ptilotula fusca	125918	Macaulay, Linda R	NA	Castlemaine-ruins of Gower School	NA	NA
Macaulay Library - Cornell Lab of Ornithology	Melidectes belfordi	101216	Watson, Mark	1999/02/28	Maimafu; Crater Mountain	-6.5833333	145.05
Macaulay Library - Cornell Lab of Ornithology	Melidectes rufocrissalis	100596	Mack, Andrew L	1999/01/24	6.0 km SE of Maimafu Airstrip; Maimafu Camp, Near Summit Crater Mountain	-6.5344444	145.0669444
Macaulay Library - Cornell Lab of Ornithology	Myzomela rosenbergii	100572	Mack, Andrew L	1999/01/15	6.0 km SE of Maimafu Airstrip; Maimafu Camp, Near Summit Crater Mountain	-6.5344444	145.0669444
Macaulay Library - Cornell Lab of Ornithology	Melidectes rufocrissalis	100536	Mack, Andrew L	1998/10/12	11.0 km NW of Herowana Airstrip; Herowana Camp "arosele"	-6.5672222	145.1180556
Macaulay Library - Cornell Lab of Ornithology	Purnella albifrons	91613	Connop, Scott	1993/12/09	Hattah-Kulkyne National Park	NA	NA
Macaulay Library - Cornell Lab of Ornithology	Ptilotula ornata	91607	Connop, Scott	1993/12/07	Wyperfeld National Park	NA	NA
Macaulay Library - Cornell Lab of Ornithology	Caligavis chrysops	78906	Robbins, Mark B	1992/06/29	20.0 km N of Baradine; Pilliga State Forest	NA	NA
Macaulay Library - Cornell Lab of Ornithology	Ptilotula penicillata	78902	Robbins, Mark B	1992/06/29	20.0 km N of Baradine; Pilliga State Forest	NA	NA
Macaulay Library - Cornell Lab of Ornithology	Caligavis chrysops	77557	Robbins, Mark B	1990/12/27	Tidal River, Wilson's Promontory	NA	NA
Macaulay Library - Cornell Lab of Ornithology	Meliphaga lewinii	71652	Connop, Scott	1993/10/22	Mount Lewis	-16.5833333	145.2833333
Macaulay Library - Cornell Lab of Ornithology	Myzomela rubratra	55634	Pratt, H. Douglas	1988/02/23	3.0 km N of Lelu	5.35677	163.02097
Macaulay Library - Cornell Lab of Ornithology	Myzomela adolphinae	22787	Pratt, Thane K	NA	Wau. Wau Ecology Institute.	-7.3333333	146.6666667
Macaulay Library - Cornell Lab of Ornithology	Philemon buceroides novaeguineae	22783	Pratt, Thane K	NA	Wau. Wau Ecology Institute.	-7.3333333	146.6666667
Macaulay Library - Cornell Lab of Ornithology	Melidectes fuscus	22741	Pratt, Thane K	1974/11/10	Wau.	-7.5	146.6666667
Macaulay Library - Cornell Lab of Ornithology	Myzomela rosenbergii	22721	Pratt, Thane K	1974/09/21	Wau. Mt. Mission.	-7.25	146.8333333
Macaulay Library - Cornell Lab of Ornithology	Melithreptus validirostris	14960	Loetscher, Jr., Fred W	1969/03/21	Mount Field National Park	-42.7	146.75
Macaulay Library - Cornell Lab of Ornithology	Lichmera indistincta	14949	Loetscher, Jr., Fred W	1969/02/05	1.6 km W of Port Douglas	-16.3666667	145.35
Macaulay Library - Cornell Lab of Ornithology	Myzomela rubratra	5592	Pratt, H. Douglas	NA	Guam	NA	NA
Macaulay Library - Cornell Lab of Ornithology	Myzomela rubratra	5297	Pratt, H. Douglas	1978/06/13	UH DISTRICT; VILLAGE HOTEL	NA	NA
Macaulay Library - Cornell Lab of Ornithology	Myzomela cardinalis	515773	Andersen, Michael J	2014/12/06	Gaua Island; East shore Lake Letes	-14.2747	167.5488
Macaulay Library - Cornell Lab of Ornithology	Anthornis melanura	515213	Mathers-Winn, Cedar A	2014/01/10	Waipohatu Reserve, The Catlins	-46.618383	169.012383
Macaulay Library - Cornell Lab of Ornithology	Anthornis melanura	515206	Mathers-Winn, Cedar A	2014/01/08	Trotter's Gorge Scenic Reserve	-45.404133	170.780783
Macaulay Library - Cornell Lab of Ornithology	Acanthorhynchus tenuirostris	206508	Heaton Crisologo, Taylor	2015/07/09	Blue Mountains National Park; Transit of Venus Walk	-33.72689	150.47318
Macaulay Library - Cornell Lab of Ornithology	Acanthorhynchus tenuirostris	206291	Heaton Crisologo, Taylor	2015/06/24	Blue Mountains National Park; Kedumba Road	-33.75224	150.37355
Macaulay Library - Cornell Lab of Ornithology	Meliphaga lewinii	206245	Dzielski, Sarah	2015/06/10	Blue Mountains National Park	-33.72223	150.31779
Macaulay Library - Cornell Lab of Ornithology	Meliphaga lewinii	206241	Dzielski, Sarah	2015/06/02	Blue Mountains National Park	-33.69234	150.55934
Macaulay Library - Cornell Lab of Ornithology	Acanthorhynchus tenuirostris	206221	Dzielski, Sarah	2015/05/31	Blue Mountains National Park	-33.7217	150.31725
Macaulay Library - Cornell Lab of Ornithology	Meliphaga lewinii	206220	Dzielski, Sarah	2015/05/31	Blue Mountains National Park	-33.7217	150.31725
Macaulay Library - Cornell Lab of Ornithology	Myzomela eichhorni	202819	Robbins, Mark B	2014/11/14	Gizo Island; Saeragi	-8.0433	156.7753
Macaulay Library - Cornell Lab of Ornithology	Ramsayornis modestus	201255	Greig, Emma I	2012/09/13	Cape York; Iron Range	-12.79622	143.32764
Macaulay Library - Cornell Lab of Ornithology	Gavicalis versicolor	200595	Greig, Emma I	2012/10/01	Cape York; Mount Adolphus	-10.64953	142.64583
Macaulay Library - Cornell Lab of Ornithology	Lichmera indistincta	200572	Greig, Emma I	2012/09/29	Cape York; Getullai Island	-10.18375	142.50325
Macaulay Library - Cornell Lab of Ornithology	Acanthagenys rufogularis	189708	McNeill, Roger D	2013/10/19	Jondawin	-27.2246	151.3646
Macaulay Library - Cornell Lab of Ornithology	Grantiella picta	189707	McNeill, Roger D	2013/10/19	Jondawin	-27.2246	151.3646
Macaulay Library - Cornell Lab of Ornithology	Gavicalis fasciogularis	189009	Mathers-Winn, Cedar A	2013/11/10	Moreton Terrace Park, Beachmere	-27.1414167	145.0492167
Macaulay Library - Cornell Lab of Ornithology	Meliphaga lewinii	188912	Mathers-Winn, Cedar A	2013/09/22	Lake Samsonvale	-27.27317	152.86398
Macaulay Library - Cornell Lab of Ornithology	Melidectes torquatus	167092	Freeman, Benjamin G	2011/07/23	YUS Conservation Area 1450m	NA	NA
Macaulay Library - Cornell Lab of Ornithology	Gymnomyza brunneirostris	139785	Pratt, H. Douglas	2005/11/18	Monasavu Road	-17.671005	177.993623
Macaulay Library - Cornell Lab of Ornithology	Melidectes fuscus	139650	Beehler, Bruce M	2005/09/06	5.0 km S of Porgera town	NA	NA
Macaulay Library - Cornell Lab of Ornithology	Melidectes belfordi	139634	Beehler, Bruce M	2005/09/05	5.0 km S of Porgera town	NA	NA
Macaulay Library - Cornell Lab of Ornithology	Melidectes foersteri	139598	Beehler, Bruce M	2008/07/26	S of Wasaunon Camp; Saruwaged Mts.	NA	NA
Macaulay Library - Cornell Lab of Ornithology	Ptilotula fusca	128364	Macaulay, Linda R	2005/10/13	Alpine National Park	NA	NA
Macaulay Library - Cornell Lab of Ornithology	Manorina flavigula	125952	Macaulay, Linda R	NA	Ouyen	NA	NA
Macaulay Library - Cornell Lab of Ornithology	Acanthorhynchus tenuirostris	125949	Macaulay, Linda R	NA	Hall's Gap	NA	NA
Macaulay Library - Cornell Lab of Ornithology	Ptilotula ornata	125926	Macaulay, Linda R	2005/10/07	Ouyen - Hattah-Kulkyne Park	NA	NA
Macaulay Library - Cornell Lab of Ornithology	Pycnopygius ixoides	100491	Mack, Andrew L	1998/05/04	20.0 km N of Timika; mile 38, Freeport Mining COW A	NA	NA
Macaulay Library - Cornell Lab of Ornithology	Xanthotis flaviventer	79873	Mack, Andrew L	1996/10/17	11.0 km SW of Tekadu Airstrip (Ivimka Camp)	-7.7347222	146.4958333
Macaulay Library - Cornell Lab of Ornithology	Acanthagenys rufogularis	78930	Robbins, Mark B	1992/07/01	20.0 km E of Baradine	NA	NA
Macaulay Library - Cornell Lab of Ornithology	Acanthagenys rufogularis	78903	Robbins, Mark B	1992/06/29	20.0 km N of Baradine; Pilliga State Forest	NA	NA
Macaulay Library - Cornell Lab of Ornithology	Meliphaga lewinii	78555	Robbins, Mark B	1992/06/18	1.0 km S of Yungaburra; Curtain Fig Park	NA	NA
Macaulay Library - Cornell Lab of Ornithology	Meliphaga lewinii	78547	Robbins, Mark B	1992/06/16	8.0 km NW of Mossman (8km WNW)	NA	NA
Macaulay Library - Cornell Lab of Ornithology	Meliphaga lewinii	78546	Robbins, Mark B	1992/06/16	8.0 km NW of Mossman (8km WNW)	NA	NA
Macaulay Library - Cornell Lab of Ornithology	Bolemoreus frenatus	77583	Robbins, Mark B	1991/01/06	10.0 km SE of Malanda; Topaz	NA	NA
Macaulay Library - Cornell Lab of Ornithology	Caligavis chrysops	77537	Robbins, Mark B	1990/12/24	Zumstein; west side of Grampians	NA	NA
Macaulay Library - Cornell Lab of Ornithology	Bolemoreus frenatus	71651	Connop, Scott	1993/10/22	Mount Lewis	-16.5833333	145.2833333
Macaulay Library - Cornell Lab of Ornithology	Myzomela rosenbergii	65899	Connop, Scott	1993/10/07	Ambua Lodge; The Gap	-5.8333333	142.5833333
Macaulay Library - Cornell Lab of Ornithology	Caligavis subfrenata	65886	Connop, Scott	1993/10/04	Ambua Lodge; from the Gap	-5.8333333	142.5833333
Macaulay Library - Cornell Lab of Ornithology	Myzomela sanguinolenta	57243	Macaulay, Linda R	1992/07/06	Kuranda State Forest; 1st (dirt) road to right; "MacKenzie's Pocket"	-16.5	146
Macaulay Library - Cornell Lab of Ornithology	Myzomela sanguinolenta	57237	Macaulay, Linda R	1992/07/06	Kuranda State Forest; "MacKenzie's Pocket" at sign post on Black Mt. Rd.; above Cassowary House	-16.5	146
Macaulay Library - Cornell Lab of Ornithology	Myzomela rubratra	55674	Pratt, H. Douglas	1988/02/27	Nanpil Valley	6.92058	158.20904
Macaulay Library - Cornell Lab of Ornithology	Melidectes belfordi	20982	Zimmerman, Dale A; Edwards, Martin	1979/08/03	Illaru Pass; Near Wau	-7.5	146.5
Macaulay Library - Cornell Lab of Ornithology	Philemon buceroides novaeguineae	20977	Zimmerman, Dale A; Edwards, Martin	1979/08/02	Wau	-7.5	146.5
Macaulay Library - Cornell Lab of Ornithology	Gavicalis virescens	20543	Orenstein, Ronald I	1974/02/26	near Kimbra, Eyre Peninsula	NA	NA
Macaulay Library - Cornell Lab of Ornithology	Gymnomyza brunneirostris	20501	Orenstein, Ronald I	1974/06/19	16.0 km SW of Suva, Nailagosakelo Creek	NA	NA
Macaulay Library - Cornell Lab of Ornithology	Melithreptus albogularis	14958	Loetscher, Jr., Fred W	1969/01/31	E of Mareeba	-17	145.3666667
Macaulay Library - Cornell Lab of Ornithology	Anthornis melanura	14946	Ward, William V	1969/11/21	NELSON LAKES NAT. PARK; LAKE ROTOROA	-41.7833333	172.9166667
Macaulay Library - Cornell Lab of Ornithology	Gymnomyza brunneirostris	5796	Bruner, Phillip L	1977/07/09	Viti Levu; Savura Creek Watershed	NA	NA
Macaulay Library - Cornell Lab of Ornithology	Gymnomyza brunneirostris	5787	Bruner, Phillip L	1977/07/09	Viti Levu; Joske's Thumb	NA	NA
Macaulay Library - Cornell Lab of Ornithology	Gymnomyza brunneirostris	5782	Bruner, Phillip L	NA		NA	NA
Macaulay Library - Cornell Lab of Ornithology	Gymnomyza brunneirostris	5770	Bruner, Phillip L	1977/07/08	SUVA; SAVURA CREEK	NA	NA
Macaulay Library - Cornell Lab of Ornithology	Myzomela rubratra	5300	Pratt, H. Douglas	1978/06/13	UH DISTRICT; VILLAGE HOTEL	NA	NA
Macaulay Library - Cornell Lab of Ornithology	Melidectes foersteri	182798	Freeman, Benjamin G	2012/05/25	YUS Conservation Area	-5.98	146.83
Macaulay Library - Cornell Lab of Ornithology	Melipotes ater	182770	Freeman, Benjamin G	2012/05/22	YUS Conservation Area	-5.98	146.83
Macaulay Library - Cornell Lab of Ornithology	Xanthotis flaviventer	182722	Class, Alexandra M	2012/11/23	Mount Karimui	-6.55	144.76
Macaulay Library - Cornell Lab of Ornithology	Xanthotis flaviventer	173734	Greig, Emma I	2012/09/14	Iron Range National Park	-12.71333	143.29858
Macaulay Library - Cornell Lab of Ornithology	Meliphacator provocator	139764	Pratt, H. Douglas	2005/11/15	Kadavu; Matana Beach Resort	-19.007556	178.161906
Macaulay Library - Cornell Lab of Ornithology	Gymnomyza viridis	139691	Pratt, H. Douglas	2005/11/10	Taveuni; Des Voeux Peak Road, Mt. Uluigalau	-16.94021	179.9698
Macaulay Library - Cornell Lab of Ornithology	Myzomela rosenbergii	139646	Beehler, Bruce M	2005/09/06	5.0 km S of Porgera town	NA	NA
Macaulay Library - Cornell Lab of Ornithology	Melidectes leucostephes	139617	Beehler, Bruce M	2006/09/04	10.0 km S of Waibeem Village; Tamrau Mts.	NA	NA
Macaulay Library - Cornell Lab of Ornithology	Caligavis subfrenata	139601	Beehler, Bruce M	2008/07/26	S of Wasaunon Camp; Saruwaged Mts.	NA	NA
Macaulay Library - Cornell Lab of Ornithology	Melithreptus gularis	78921	Robbins, Mark B	1992/07/01	20.0 km E of Baradine	NA	NA
Macaulay Library - Cornell Lab of Ornithology	Purnella albifrons	20544	Orenstein, Ronald I	1974/03/01	near Wilcherry, Eyre Peninsula	NA	NA
Macaulay Library - Cornell Lab of Ornithology	Melithreptus affinis	20535	Orenstein, Ronald I	1974/02/12	Tinderbox	NA	NA
Macaulay Library - Cornell Lab of Ornithology	Gymnomyza brunneirostris	5789	Bruner, Phillip L	1977/07/09	Viti Levu; Joske's Thumb	NA	NA
Macaulay Library - Cornell Lab of Ornithology	Gymnomyza brunneirostris	5766	Bruner, Phillip L	1977/07/07	SUVA; SAVURA CREEK	NA	NA
Macaulay Library - Cornell Lab of Ornithology	Myzomela rubratra	5525	Pratt, H. Douglas	1978/07/21	KOLONIA;CLIFF RAINBOW HOTEL	NA	NA
Macaulay Library - Cornell Lab of Ornithology	Foulehaio carunculatus	139929	Pratt, H. Douglas	2006/11/24	4.0 km SE of Aopo Village	-13.57672	-172.508821
Macaulay Library - Cornell Lab of Ornithology	Philemon cockerelli	107065	Brown, Eleanor D	1996/03/11	10.0 km W of Uvol, ENB	NA	NA
Macaulay Library - Cornell Lab of Ornithology	Philemon buceroides novaeguineae	100451	Mack, Andrew L	1998/04/22	139.0 km NW of Tembagapura; Paniai Kabupaten; Lagori, Landing Site 21	-3.0005556	136.5505556
Macaulay Library - Cornell Lab of Ornithology	Caligavis obscura	79894	Mack, Andrew L	1996/11/04	11.0 km SW of Tekadu Airstrip (Ivimka Camp), Lakekamu Basin	-7.7347222	146.4958333
Macaulay Library - Cornell Lab of Ornithology	Melidectes belfordi	65867	Connop, Scott	1993/10/03	Ambua Lodge; The Gap	-5.8333333	142.5833333
Macaulay Library - Cornell Lab of Ornithology	Meliphaga analoga	65845	Connop, Scott	1993/09/30	Varirata	-9.5333333	147.2333333
Macaulay Library - Cornell Lab of Ornithology	Meliphacator provocator	64526	Pratt, H. Douglas	1992/07/06	Galoa Island (south of Kadavu); Reece's Place	NA	NA
Macaulay Library - Cornell Lab of Ornithology	Meliphacator provocator	64520	Pratt, H. Douglas	1992/07/05	Galoa Island (south of Kadavu)	NA	NA
Macaulay Library - Cornell Lab of Ornithology	Myzomela cardinalis	64459	Pratt, H. Douglas	1992/06/29	20.0 km N of Luganville; Espiritu Santo	NA	NA
Xeno Canto - Naturalis Biodiversity Center	Acanthorhynchus_tenuirostris	269691	Marc Anderson	2015/08/21	Capertee National Park, NSW	-33.0226	150.0369
Xeno Canto - Naturalis Biodiversity Center	Acanthorhynchus_tenuirostris	172033	Marc Anderson	2013/11/21	Capertee River, NSW	-33.046	150.162
Xeno Canto - Naturalis Biodiversity Center	Acanthorhynchus_tenuirostris	171972	Marc Anderson	2012/10/10	Barren Grounds, New South Wales	-34.6695	150.7112
Xeno Canto - Naturalis Biodiversity Center	Acanthorhynchus_tenuirostris	171971	Marc Anderson	2012/09/12	Barren Grounds, New South Wales	-34.6695	150.7112
Xeno Canto - Naturalis Biodiversity Center	Acanthorhynchus_tenuirostris	171970	Marc Anderson	2012/09/12	Barren Grounds, New South Wales	-34.6695	150.7112
Xeno Canto - Naturalis Biodiversity Center	Acanthorhynchus_tenuirostris	146133	Marc Anderson	2012/10/18	Royal National Park, New South Wales	-34.0833	151.0833
Xeno Canto - Naturalis Biodiversity Center	Acanthorhynchus_tenuirostris	146129	Marc Anderson	2012/10/18	Royal National Park, New South Wales	-34.0833	151.0833
Xeno Canto - Naturalis Biodiversity Center	Acanthorhynchus_tenuirostris	140213	Marc Anderson	2012/10/16	Barren Grounds, New South Wales	-34.6695	150.7112
Xeno Canto - Naturalis Biodiversity Center	Acanthorhynchus_tenuirostris	104812	Eliot Miller	NA	Mogo Creek, Yengo National Park, New South Wales	-33.166	151.065
Xeno Canto - Naturalis Biodiversity Center	Acanthorhynchus_tenuirostris	91550	Nigel Jackett	2011/12/16	Bellawongarah, NSW	-34.74	150.645
Xeno Canto - Naturalis Biodiversity Center	Acanthorhynchus_tenuirostris	256709	nick talbot	2015/06/29	Banora Point, New South Wales	-28.2283	153.5387
Xeno Canto - Naturalis Biodiversity Center	Acanthorhynchus_tenuirostris	187354	nick talbot	2013/01/27	Newhaven, Victoria	-38.5192	145.3522
Xeno Canto - Naturalis Biodiversity Center	Acanthorhynchus_tenuirostris	91640	Nigel Jackett	2011/12/19	Bellawongarah, NSW	-34.74	150.645
Xeno Canto - Naturalis Biodiversity Center	Acanthorhynchus_tenuirostris	104747	Eliot Miller	2010/11/15	Mt Lewis, Atherton Tableland, Qld	-16.539	145.287
Xeno Canto - Naturalis Biodiversity Center	Acanthorhynchus_superciliosus	165262	John Graff	2014/01/24	Victoria Dam access track (near Canning Mills), Western Australia	-32.0402	116.0687
Xeno Canto - Naturalis Biodiversity Center	Certhionyx_variegatus	239361	Nigel Jackett	2012/04/03	Bogada Bore (Jundee Station), Western Australia	-26.3398	120.5927
Xeno Canto - Naturalis Biodiversity Center	Certhionyx_variegatus	155013	Henk Krajenbrink	2013/07/12	Parachilna, South Australia	-31.1334	138.3991
Xeno Canto - Naturalis Biodiversity Center	Pycnopygius_cinereus	215815	Patrik �berg	2014/12/23	Arfak Mountains, Vogelkop, Papua	-1.0656	133.7859
Xeno Canto - Naturalis Biodiversity Center	Pycnopygius_stictocephalus	268369	Frank Lambert	2015/07/25	Kwatu Lodge (clearing location), Ketu River (Elevala River tributary), Western Province	-6.0747	141.5235
Xeno Canto - Naturalis Biodiversity Center	Pycnopygius_stictocephalus	62182	Frank Lambert	2009/07/02	Brown River area, near Port Moresby	-9.2992	147.1548
Xeno Canto - Naturalis Biodiversity Center	Pycnopygius_stictocephalus	279401	John V. Moore	1996/08/15	Lae, Morobe Province	-6.73	146.997
Xeno Canto - Naturalis Biodiversity Center	Pycnopygius_stictocephalus	279309	John V. Moore	1996/08/06	km 17 Kiunga-Tabubil road, Western Province	-5.954	141.288
Xeno Canto - Naturalis Biodiversity Center	Pycnopygius_stictocephalus	140722	Bas van Balen	2000/09/05	Dabra, Southern Mamberamo basin, Papua	-2.9124	138.3838
Xeno Canto - Naturalis Biodiversity Center	Pycnopygius_stictocephalus	140721	Bas van Balen	2000/09/07	Dabra, Southern Mamberamo basin, Papua	-2.9124	138.3838
Xeno Canto - Naturalis Biodiversity Center	Pycnopygius_stictocephalus	105053	Bas van Balen	2000/08/06	Mile 38, Freeport, Mimika,Papua	-4.4152	136.9322
Xeno Canto - Naturalis Biodiversity Center	Prosthemadera_novaeseelandiae	214591	Johannes Fischer	2015/02/22	Wellington, Wellington City, Wellington	-41.2947	174.75
Xeno Canto - Naturalis Biodiversity Center	Prosthemadera_novaeseelandiae	198859	Rob van Bemmelen	2014/01/10	Rakiura National Park (near Oban), Southland District, Southland	-46.9012	168.0922
Xeno Canto - Naturalis Biodiversity Center	Prosthemadera_novaeseelandiae	198851	Rob van Bemmelen	2014/01/11	Oban, Southland District, Southland	-46.8979	168.1252
Xeno Canto - Naturalis Biodiversity Center	Prosthemadera_novaeseelandiae	70960	Sandra V. Valderrama	2010/03/13	Hunua Ranges	-37.0814	175.1995
Xeno Canto - Naturalis Biodiversity Center	Prosthemadera_novaeseelandiae	40495	Sandra Valderrama	2009/01/20	Mapara Forest Reserve	-38.482351	175.113487
Xeno Canto - Naturalis Biodiversity Center	Prosthemadera_novaeseelandiae	33763	Patrik �berg	2004/12/18	Ulva Island	-46.933268	168.130217
Xeno Canto - Naturalis Biodiversity Center	Prosthemadera_novaeseelandiae	207334	Dan Lane	2014/11/23	Ulva Island	-46.9333	168.1302
Xeno Canto - Naturalis Biodiversity Center	Prosthemadera_novaeseelandiae	207315	Dan Lane	2014/11/23	Ulva Island	-46.9333	168.1302
Xeno Canto - Naturalis Biodiversity Center	Prosthemadera_novaeseelandiae	198860	Rob van Bemmelen	2014/01/10	Rakiura National Park (near Oban), Southland District, Southland	-46.9012	168.0922
Xeno Canto - Naturalis Biodiversity Center	Prosthemadera_novaeseelandiae	185782	nick talbot	2012/11/19	Tiritiri Matangi island, Auckland	-36.6209	175.017
Xeno Canto - Naturalis Biodiversity Center	Anthornis_melanura	96768	Justin Doyle	2011/12/20	Hanmer Springs Forest	-42.525	172.835
Xeno Canto - Naturalis Biodiversity Center	Anthornis_melanura	46601	Daniel Lane	2010/03/08	Banks Pensinsula, S side near Little Creek, South Island	-43.744	172.876
Xeno Canto - Naturalis Biodiversity Center	Anthornis_melanura	46600	Daniel Lane	2010/03/06	Heywood Terrace, Christchurch, South Island	-43.524	172.654
Xeno Canto - Naturalis Biodiversity Center	Anthornis_melanura	40098	Sandra Valderrama	2009/07/02	Waipapa Ecological Area, Pureora Forest, North Island	-38.317956	175.652161
Xeno Canto - Naturalis Biodiversity Center	Anthornis_melanura	33750	Patrik �berg	2004/12/15	Te Anaua Downs	-45.204296	167.831268
Xeno Canto - Naturalis Biodiversity Center	Anthornis_melanura	46586	Daniel Lane	2010/03/04	Arthur's Pass, about 4 km S, South Island	-43.001	171.587
Xeno Canto - Naturalis Biodiversity Center	Anthornis_melanura	96768	Justin Doyle	2011/12/20	Hanmer Springs Forest	-42.525	172.835
Xeno Canto - Naturalis Biodiversity Center	Anthornis_melanura	46601	Daniel Lane	2010/03/08	Banks Pensinsula, S side near Little Creek, South Island	-43.744	172.876
Xeno Canto - Naturalis Biodiversity Center	Anthornis_melanura	46600	Daniel Lane	2010/03/06	Heywood Terrace, Christchurch, South Island	-43.524	172.654
Xeno Canto - Naturalis Biodiversity Center	Anthornis_melanura	40098	Sandra Valderrama	2009/07/02	Waipapa Ecological Area, Pureora Forest, North Island	-38.317956	175.652161
Xeno Canto - Naturalis Biodiversity Center	Anthornis_melanura	33750	Patrik �berg	2004/12/15	Te Anaua Downs	-45.204296	167.831268
Xeno Canto - Naturalis Biodiversity Center	Anthornis_melanura	46586	Daniel Lane	2010/03/04	Arthur's Pass, about 4 km S, South Island	-43.001	171.587
Xeno Canto - Naturalis Biodiversity Center	Meliphaga_aruensis	118403	Niels Poul Dreyer	1990/07/07	Varirata National Park, National Capital District	-9.4667	147.3834
Xeno Canto - Naturalis Biodiversity Center	Meliphaga_aruensis	24808	Niels Krabbe	2006/12/23	Varirata National Park, National Capital District	-9.4667	147.3834
Xeno Canto - Naturalis Biodiversity Center	Meliphaga_notata	158628	Fernand Deroussen	2011/11/08	Kingfisher Park, Julatten Atherton Tableland Qld	-16.595	145.34
Xeno Canto - Naturalis Biodiversity Center	Meliphaga_notata	120895	Phil Gregory	2012/12/14	Cassowary House, Kuranda, Queensland, Australia	-16.805	145.635
Xeno Canto - Naturalis Biodiversity Center	Meliphaga_orientalis	194125	Phil Gregory	2014/07/26	nr Kama Village (Anji Valley) nr Mt Hagen Enga province	-5.7303	143.9484
Xeno Canto - Naturalis Biodiversity Center	Meliphaga_analoga	279307	John V. Moore	1996/08/06	km 17 Kiunga-Tabubil road, Western Province	-5.954	141.288
Xeno Canto - Naturalis Biodiversity Center	Meliphaga_analoga	279307	John V. Moore	1996/08/06	km 17 Kiunga-Tabubil road, Western Province	-5.954	141.288
Xeno Canto - Naturalis Biodiversity Center	Meliphaga_analoga	279307	John V. Moore	1996/08/06	km 17 Kiunga-Tabubil road, Western Province	-5.954	141.288
Xeno Canto - Naturalis Biodiversity Center	Meliphaga_flavirictus	194123	Phil Gregory	2014/04/24	Kwatu Lodge, Ketu River (Elevala River tributary), Western Province	-6.0812	141.5034
Xeno Canto - Naturalis Biodiversity Center	Meliphaga_flavirictus	141966	Bas van Balen	2002/03/30	Tangguh, West Papua	NA	NA
Xeno Canto - Naturalis Biodiversity Center	Meliphaga_albilineata	140177	Marc Anderson	2012/09/05	Kakadu National Park (near Kakadu), Northern Territory	-12.864	132.845
Xeno Canto - Naturalis Biodiversity Center	Meliphaga_albilineata	104047	Eliot Miller	2011/09/20	Gunlom Falls, Kakadu	-13.4298	132.4212
Xeno Canto - Naturalis Biodiversity Center	Meliphaga_albilineata	172307	Marc Anderson	2012/10/23	Kakadu National Park (near Kakadu), Northern Territory	-12.864	132.845
Xeno Canto - Naturalis Biodiversity Center	Meliphaga_fordiana	104053	Eliot Miller	2011/10/03	Mitchell Falls	-14.821997	125.710135
Xeno Canto - Naturalis Biodiversity Center	Meliphaga_fordiana	104051	Eliot Miller	2011/10/03	Mitchell Falls	-14.821997	125.710135
Xeno Canto - Naturalis Biodiversity Center	Meliphaga_fordiana	104052	Eliot Miller	2011/10/03	Mitchell Falls	-14.821997	125.710135
Xeno Canto - Naturalis Biodiversity Center	Meliphaga_reticulata	292413	Mike Nelson	2015/06/23	Bipolo, Timor Barat	-10.011	123.803
Xeno Canto - Naturalis Biodiversity Center	Meliphaga_reticulata	131359	Colin Trainor	2013/04/14	Assalaino, Lautem	-8.4001	127.0145
Xeno Canto - Naturalis Biodiversity Center	Meliphaga_reticulata	116500	Colin Trainor	2012/08/12	Otan, Semau Island, Indonesia	-10.1876	123.3798
Xeno Canto - Naturalis Biodiversity Center	Meliphaga_reticulata	36767	Colin Trainor	2004/11/26	Assalaino, Lautem	-8.4001	127.0145
Xeno Canto - Naturalis Biodiversity Center	Meliphaga_reticulata	292413	Mike Nelson	2015/06/23	Bipolo, Timor Barat	-10.011	123.803
Xeno Canto - Naturalis Biodiversity Center	Meliphaga_reticulata	131359	Colin Trainor	2013/04/14	Assalaino, Lautem	-8.4001	127.0145
Xeno Canto - Naturalis Biodiversity Center	Meliphaga_reticulata	116500	Colin Trainor	2012/08/12	Otan, Semau Island, Indonesia	-10.1876	123.3798
Xeno Canto - Naturalis Biodiversity Center	Meliphaga_reticulata	36767	Colin Trainor	2004/11/26	Assalaino, Lautem	-8.4001	127.0145
Xeno Canto - Naturalis Biodiversity Center	Meliphaga_gracilis	125289	Phil Gregory	2013/03/17	Cassowary House, Kuranda, Queensland, Australia	-16.805	145.635
Xeno Canto - Naturalis Biodiversity Center	Meliphaga_gracilis	105071	Eliot Miller	2011/12/05	Kingfisher Park, Julatten Atherton Tableland Qld	-16.5948	145.34
Xeno Canto - Naturalis Biodiversity Center	Meliphaga_gracilis	158686	Fernand Deroussen	2011/11/09	Kingfisher Park, Julatten Atherton Tableland Qld	-16.595	145.34
Xeno Canto - Naturalis Biodiversity Center	Meliphaga_gracilis	158228	Henk Krajenbrink	2013/07/22	Iron Range NP, Queensland	-12.7178	143.283
Xeno Canto - Naturalis Biodiversity Center	Meliphaga_gracilis	149706	Phil Gregory	2013/09/26	Kuranda, Queensland	-16.8189	145.6364
Xeno Canto - Naturalis Biodiversity Center	Meliphaga_gracilis	105072	Eliot Miller	2011/12/05	Kingfisher Park, Julatten Atherton Tableland Qld	-16.5948	145.34
Xeno Canto - Naturalis Biodiversity Center	Meliphaga_cinereifrons	148747	Phil Gregory	2013/07/29	Varirata National Park, Central Province	-9.4667	147.3834
Xeno Canto - Naturalis Biodiversity Center	Stomiopera_unicolor	172129	Marc Anderson	2012/10/25	Middle Point, Northern Territory	-12.561	131.3023
Xeno Canto - Naturalis Biodiversity Center	Stomiopera_unicolor	172069	Marc Anderson	2013/11/06	Kakadu National Park (near Kakadu), Northern Territory	-12.8967	132.5176
Xeno Canto - Naturalis Biodiversity Center	Stomiopera_unicolor	172068	Marc Anderson	2013/11/06	Kakadu National Park (near Kakadu), Northern Territory	-12.8967	132.5176
Xeno Canto - Naturalis Biodiversity Center	Purnella_albifrons	171829	Marc Anderson	2013/10/11	Nombinnie Nature Reserve, Euabalong, New South Wales	-33.0269	146.1812
Xeno Canto - Naturalis Biodiversity Center	Purnella_albifrons	171825	Marc Anderson	2013/10/11	Nombinnie Nature Reserve, Euabalong, New South Wales	-33.0269	146.1812
Xeno Canto - Naturalis Biodiversity Center	Caligavis_chrysops	104876	Eliot Miller	NA	Mogo Creek, Yengo National Park, New South Wales	-33.1659	151.0648
Xeno Canto - Naturalis Biodiversity Center	Caligavis_subfrenata	40291	Patrik �berg	2009/07/18	Lake Habbema, Snow Mountains, Papua	-4.138329	138.67424
Xeno Canto - Naturalis Biodiversity Center	Caligavis_subfrenata	36368	Niels Krabbe	2006/12/24	'Warili Lodge' near Tari, Southern Highlands	-5.9667	143.0501
Xeno Canto - Naturalis Biodiversity Center	Caligavis_obscura	141934	Frank Lambert	2009/07/15	Kiunga Km17 on road to Tabubil	-5.9542	141.2884
Xeno Canto - Naturalis Biodiversity Center	Caligavis_obscura	148738	Phil Gregory	2013/08/05	Kwatu Lodge, Ketu River (Elevala River tributary), Western Province	-6.0812	141.5034
Xeno Canto - Naturalis Biodiversity Center	Lichenostomus_melanops	172252	Marc Anderson	2013/07/18	Kings Plains National Park (near Kings Plains), New South Wales	-29.5755	151.3619
Xeno Canto - Naturalis Biodiversity Center	Manorina_melanocephala	269671	Marc Anderson	2015/08/21	Capertee National Park, NSW	-33.0226	150.0369
Xeno Canto - Naturalis Biodiversity Center	Manorina_melanocephala	206629	Marc Anderson	2014/03/04	Leeton, New South Wales	-34.5082	146.4231
Xeno Canto - Naturalis Biodiversity Center	Manorina_melanocephala	172034	Marc Anderson	2013/11/21	Capertee River, NSW	-33.046	150.162
Xeno Canto - Naturalis Biodiversity Center	Manorina_melanocephala	98301	Patrik �berg	2011/12/30	Mt Coot-Tha NP, Brisbane	-27.4728	152.9589
Xeno Canto - Naturalis Biodiversity Center	Manorina_melanocephala	98300	Patrik �berg	2012/01/03	Barilla Holiday Park, Cambridge Tas	-42.8328	147.4448
Xeno Canto - Naturalis Biodiversity Center	Manorina_melanocephala	98299	Patrik �berg	2012/01/03	Barilla Holiday Park, Cambridge Tas	-42.8328	147.4448
Xeno Canto - Naturalis Biodiversity Center	Manorina_melanocephala	68660	Frank Lambert	2000/01/02	30 km N of Deniliquin, NSW	-35.56	144.95
Xeno Canto - Naturalis Biodiversity Center	Manorina_flavigula	287112	Marc Anderson	2015/10/14	Bowra Station, near Cunnamulla, Queensland	-27.9633	145.5848
Xeno Canto - Naturalis Biodiversity Center	Manorina_flavigula	241050	Henk Krajenbrink	2013/07/08	Flinders Ranges National Park (near Blinman), South Australia	-31.5474	138.5906
Xeno Canto - Naturalis Biodiversity Center	Melidectes_torquatus	38261	Frank Lambert	2009/07/08	Kama Village nr Mt Hagen Enga province	-5.730436	143.948364
Xeno Canto - Naturalis Biodiversity Center	Melidectes_torquatus	38262	Frank Lambert	2009/08/07	Kama Village nr Mt Hagen Enga province	-5.730436	143.948364
Xeno Canto - Naturalis Biodiversity Center	Melidectes_torquatus	26363	Frank Lambert	NA	Arfak Mountains, Vogelkop, Papua	-1.0656	133.7859
Xeno Canto - Naturalis Biodiversity Center	Melidectes_torquatus	140743	Bas van Balen	1997/10/19	Manyimbou, Arfak, Papua Barat	-1.1052	133.9673
Xeno Canto - Naturalis Biodiversity Center	Melidectes_torquatus	38264	Frank Lambert	2009/07/29	Kama Village (Anji Valley) nr Mt Hagen Enga province	-5.730436	143.948364
Xeno Canto - Naturalis Biodiversity Center	Melidectes_torquatus	38263	Frank Lambert	2009/07/08	Kama Village nr Mt Hagen Enga province	-5.730436	143.948364
Xeno Canto - Naturalis Biodiversity Center	Melidectes_torquatus	38260	Frank Lambert	2009/08/07	Kama Village nr Mt Hagen Enga province	-5.730436	143.948364
Xeno Canto - Naturalis Biodiversity Center	Melidectes_torquatus	148735	Phil Gregory	2013/07/10	nr Kama Village (Anji Valley) nr Mt Hagen Enga province	-5.7303	143.9484
Xeno Canto - Naturalis Biodiversity Center	Melidectes_ochromelas	62594	Andrew Spencer	2009/07/15	near Camp David, Arfak Mountains, Papua	NA	NA
Xeno Canto - Naturalis Biodiversity Center	Melidectes_ochromelas	26488	Frank Lambert	2002/06/17	Lake Habbema trek, Snow Mountains, Papua	-4.1081	138.7214
Xeno Canto - Naturalis Biodiversity Center	Melidectes_ochromelas	26487	Frank Lambert	2002/06/17	Lake Habbema trek, Snow Mountains, Papua	-4.1081	138.7214
Xeno Canto - Naturalis Biodiversity Center	Melidectes_ochromelas	23139	Michiel de Boer	2008/08/20	between Attenborough and Japanese Camp, Arfak Mountains, Papua	NA	NA
Xeno Canto - Naturalis Biodiversity Center	Melidectes_leucostephes	215943	Patrik �berg	2014/12/24	Arfak Mountains, Vogelkop, Papua	-1.0656	133.7859
Xeno Canto - Naturalis Biodiversity Center	Melidectes_leucostephes	62600	Andrew Spencer	2009/07/15	Garden House, Arfak Mountains, Papua	NA	NA
Xeno Canto - Naturalis Biodiversity Center	Melidectes_leucostephes	41011	Patrik �berg	2009/08/01	Arfak Mountains, Vogelkop, Papua	-1.0656	133.7859
Xeno Canto - Naturalis Biodiversity Center	Melidectes_leucostephes	26364	Frank Lambert	NA	Arfak Mountains, Vogelkop, Papua	-1.0656	133.7859
Xeno Canto - Naturalis Biodiversity Center	Melidectes_leucostephes	215945	Patrik �berg	2014/12/25	Arfak Mountains, Vogelkop, Papua	-1.0656	133.7859
Xeno Canto - Naturalis Biodiversity Center	Melidectes_leucostephes	41010	Patrik �berg	2009/07/29	Arfak Mountains, Vogelkop, Papua	-1.0656	133.7859
Xeno Canto - Naturalis Biodiversity Center	Melidectes_leucostephes	215943	Patrik �berg	2014/12/24	Arfak Mountains, Vogelkop, Papua	-1.0656	133.7859
Xeno Canto - Naturalis Biodiversity Center	Melidectes_leucostephes	62600	Andrew Spencer	2009/07/15	Garden House, Arfak Mountains, Papua	NA	NA
Xeno Canto - Naturalis Biodiversity Center	Melidectes_leucostephes	41011	Patrik �berg	2009/08/01	Arfak Mountains, Vogelkop, Papua	-1.0656	133.7859
Xeno Canto - Naturalis Biodiversity Center	Melidectes_leucostephes	26364	Frank Lambert	NA	Arfak Mountains, Vogelkop, Papua	-1.0656	133.7859
Xeno Canto - Naturalis Biodiversity Center	Melidectes_leucostephes	215945	Patrik �berg	2014/12/25	Arfak Mountains, Vogelkop, Papua	-1.0656	133.7859
Xeno Canto - Naturalis Biodiversity Center	Melidectes_leucostephes	41010	Patrik �berg	2009/07/29	Arfak Mountains, Vogelkop, Papua	-1.0656	133.7859
Xeno Canto - Naturalis Biodiversity Center	Melidectes_belfordi	22785	Mike Catsis	2008/08/11	Kumul Lodge, Enga province	-5.7912	143.9706
Xeno Canto - Naturalis Biodiversity Center	Melidectes_rufocrissalis	279387	John V. Moore	1996/08/13	"Ambua Lodge" area, Southern Highlands Province	-5.962	143.067
Xeno Canto - Naturalis Biodiversity Center	Melidectes_rufocrissalis	279319	John V. Moore	1996/08/07	Ok Tedi Mine high, Tabubil, Western Province	-5.207	141.132
Xeno Canto - Naturalis Biodiversity Center	Melidectes_rufocrissalis	176647	Phil Gregory	2014/04/20	Rondon Ridge, Mount Hagen, Dei District, Western Highlands Province	-5.8537	144.2615
Xeno Canto - Naturalis Biodiversity Center	Melidectes_rufocrissalis	279360	John V. Moore	1996/08/10	"Ambua Lodge" area, Southern Highlands Province	-5.962	143.067
Xeno Canto - Naturalis Biodiversity Center	Melidectes_rufocrissalis	87585	Iain Woxvold	2008/04/07	Maruba River, Southern Highlands Province	-6.0967	143.1045
Xeno Canto - Naturalis Biodiversity Center	Melidectes_rufocrissalis	87584	Iain Woxvold	2008/02/09	Baia River headwaters, Southern Highlands Province	-6.0206	142.5476
Xeno Canto - Naturalis Biodiversity Center	Melidectes_rufocrissalis	26161	Niels Krabbe	2006/12/28	'Ambua Lodge', Southern Highlands	-5.9667	143.0667
Xeno Canto - Naturalis Biodiversity Center	Melidectes_rufocrissalis	26160	Niels Krabbe	2006/12/24	'Warili Lodge' near Tari, Southern Highlands	-5.9667	143.0501
Xeno Canto - Naturalis Biodiversity Center	Melidectes_rufocrissalis	38265	Frank Lambert	2009/08/04	'Ambua Lodge', Southern Highlands	-5.9667	143.0667
Xeno Canto - Naturalis Biodiversity Center	Bolemoreus_frenatus	104758	Eliot Miller	NA	Mt Lewis, Atherton Tableland, Qld	-16.539	145.287
Xeno Canto - Naturalis Biodiversity Center	Bolemoreus_frenatus	104755	Eliot Miller	NA	Mt Lewis, Atherton Tableland, Qld	-16.5389	145.287
Xeno Canto - Naturalis Biodiversity Center	Bolemoreus_frenatus	96907	Patrik �berg	2011/12/23	Mt Lewis, Atherton Tableland, Qld	-16.539	145.287
Xeno Canto - Naturalis Biodiversity Center	Bolemoreus_frenatus	200570	Marc Anderson	2013/11/27	Crater Lakes National Park (near Lake Barrine), Queensland	-17.2813	145.6301
Xeno Canto - Naturalis Biodiversity Center	Bolemoreus_frenatus	104767	Eliot Miller	NA	Mt Lewis, Atherton Tableland, Qld	-16.5389	145.287
Xeno Canto - Naturalis Biodiversity Center	Bolemoreus_frenatus	104766	Eliot Miller	NA	Mt Lewis, Atherton Tableland, Qld	-16.5389	145.287
Xeno Canto - Naturalis Biodiversity Center	Bolemoreus_frenatus	104765	Eliot Miller	NA	Mt Lewis, Atherton Tableland, Qld	-16.5389	145.287
Xeno Canto - Naturalis Biodiversity Center	Bolemoreus_frenatus	104763	Eliot Miller	NA	Mt Lewis, Atherton Tableland, Qld	-16.5389	145.287
Xeno Canto - Naturalis Biodiversity Center	Bolemoreus_frenatus	104762	Eliot Miller	NA	Mt Lewis, Atherton Tableland, Qld	-16.5389	145.287
Xeno Canto - Naturalis Biodiversity Center	Bolemoreus_hindwoodi	105070	Eliot Miller	2011/11/06	Eungella National Park, QLD	-21.035	148.5962
Xeno Canto - Naturalis Biodiversity Center	Bolemoreus_hindwoodi	105069	Eliot Miller	2011/11/06	Eungella National Park, QLD	-21.035	148.5962
Xeno Canto - Naturalis Biodiversity Center	Bolemoreus_hindwoodi	105068	Eliot Miller	2011/11/06	Eungella National Park, QLD	-21.035	148.5962
Xeno Canto - Naturalis Biodiversity Center	Acanthagenys_rufogularis	287321	Marc Anderson	2015/10/13	Bowra Station, near Cunnamulla, Queensland	-27.9633	145.5848
Xeno Canto - Naturalis Biodiversity Center	Acanthagenys_rufogularis	287082	Marc Anderson	2015/10/15	Bowra Station, near Cunnamulla, Queensland	-27.9633	145.5848
Xeno Canto - Naturalis Biodiversity Center	Acanthagenys_rufogularis	287081	Marc Anderson	2015/10/15	Bowra Station, near Cunnamulla, Queensland	-27.9633	145.5848
Xeno Canto - Naturalis Biodiversity Center	Acanthagenys_rufogularis	287080	Marc Anderson	2015/10/15	Bowra Station, near Cunnamulla, Queensland	-27.9633	145.5848
Xeno Canto - Naturalis Biodiversity Center	Acanthagenys_rufogularis	200385	Marc Anderson	2014/10/11	Wyperfeld National Park (near Yaapeet), Victoria	-35.5876	142.0367
Xeno Canto - Naturalis Biodiversity Center	Acanthagenys_rufogularis	197120	Ding Li Yong	2014/09/29	Stackpoole Nature Reserve, Goolgowi, New South Wales	-33.8283	145.8346
Xeno Canto - Naturalis Biodiversity Center	Acanthagenys_rufogularis	171815	Marc Anderson	2013/10/10	Nombinnie Nature Reserve, Euabalong, New South Wales	-33.0269	146.1812
Xeno Canto - Naturalis Biodiversity Center	Acanthagenys_rufogularis	40550	Mark Harper	2009/10/18	Nallan Station	-27.455731	117.887421
Xeno Canto - Naturalis Biodiversity Center	Acanthagenys_rufogularis	30864	Vicki Powys	1993/09/03	Amphitheatre, Finke Gorge NP, NT	-24.067	132.667
Xeno Canto - Naturalis Biodiversity Center	Acanthagenys_rufogularis	241044	Henk Krajenbrink	2013/07/07	Mount Remarkable National Park (near Wilmington), South Australia	-32.8325	138.0555
Xeno Canto - Naturalis Biodiversity Center	Acanthagenys_rufogularis	188683	nick talbot	2012/03/20	Wyperfeld National Park (near Big Desert), Victoria	-35.5	142
Xeno Canto - Naturalis Biodiversity Center	Acanthagenys_rufogularis	174213	Marc Anderson	2013/09/19	Irymple, New South Wales	-32.8667	145.7333
Xeno Canto - Naturalis Biodiversity Center	Acanthagenys_rufogularis	134239	Marc Anderson	2013/05/01	Longreach, Queensland	-23.6153	144.1585
Xeno Canto - Naturalis Biodiversity Center	Anthochaera_chrysoptera	141378	Marc Anderson	2013/04/09	Royal National Park, New South Wales	-34.0833	151.0833
Xeno Canto - Naturalis Biodiversity Center	Anthochaera_chrysoptera	140221	Marc Anderson	2013/03/14	Bulli Tops, New South Wales	-34.2447	150.9169
Xeno Canto - Naturalis Biodiversity Center	Anthochaera_chrysoptera	123454	Judith Lattaway	2013/02/18	Bakers Beach, Tasmania	-41.157	146.6136
Xeno Canto - Naturalis Biodiversity Center	Anthochaera_chrysoptera	104816	Eliot Miller	NA	Mogo Creek, Yengo National Park, New South Wales	-33.166	151.065
Xeno Canto - Naturalis Biodiversity Center	Anthochaera_chrysoptera	104815	Eliot Miller	NA	Mogo Creek, Yengo National Park, New South Wales	-33.166	151.065
Xeno Canto - Naturalis Biodiversity Center	Anthochaera_chrysoptera	104813	Eliot Miller	NA	Mogo Creek, Yengo National Park, New South Wales	-33.166	151.065
Xeno Canto - Naturalis Biodiversity Center	Anthochaera_chrysoptera	101670	Judith Lattaway	2012/05/22	Burpengary Qld	-27.1334	153.0167
Xeno Canto - Naturalis Biodiversity Center	Anthochaera_chrysoptera	98279	Patrik �berg	2012/01/03	Hobart botanical garden, Tas	-42.8659	147.332
Xeno Canto - Naturalis Biodiversity Center	Anthochaera_chrysoptera	98277	Patrik �berg	2012/01/02	Peter Murrell Conservation Area, Tas	-43.005	147.298
Xeno Canto - Naturalis Biodiversity Center	Anthochaera_chrysoptera	66238	Steve Draper	2010/12/12	South Yarra, VIC	-37.835	145
Xeno Canto - Naturalis Biodiversity Center	Anthochaera_lunulata	30862	Vicki Powys	NA	Kings Park, Perth, WA	-31.9501	115.8167
Xeno Canto - Naturalis Biodiversity Center	Anthochaera_lunulata	165193	John Graff	2014/01/22	Menora, Western Australia	-31.9224	115.8604
Xeno Canto - Naturalis Biodiversity Center	Anthochaera_lunulata	189762	Martin Cake	2014/08/05	Mount Lawley, Western Australia	-31.924	115.8666
Xeno Canto - Naturalis Biodiversity Center	Anthochaera_phrygia	30871	Vicki Powys	2008/07/22	Capertee River, Capertee Valley, NSW	-33.0334	150.1501
Xeno Canto - Naturalis Biodiversity Center	Anthochaera_phrygia	30870	Vicki Powys	1997/06/10	Capertee Valley, NSW	-33.1214	150.1409
Xeno Canto - Naturalis Biodiversity Center	Anthochaera_carunculata	110931	Friends of Black Hill and Morialta Inc	2012/07/21	Black Hill Conservation Park	-34.869	138.715
Xeno Canto - Naturalis Biodiversity Center	Anthochaera_carunculata	30861	Vicki Powys	1996/03/29	Sunny Corner, NSW	-33.3834	149.9001
Xeno Canto - Naturalis Biodiversity Center	Gavicalis_versicolor	277668	Krzysztof Deoniziak	2015/08/10	Cairns, Queensland	-16.921	145.7674
Xeno Canto - Naturalis Biodiversity Center	Gavicalis_versicolor	277665	Krzysztof Deoniziak	2015/08/10	Cairns, Queensland	-16.921	145.7674
Xeno Canto - Naturalis Biodiversity Center	Gavicalis_versicolor	165723	Adrian Walsh	2013/04/27	Cairns, Queensland	-16.9249	145.7806
Xeno Canto - Naturalis Biodiversity Center	Gavicalis_versicolor	140365	Bas van Balen	2002/04/12	Ajkwa Eastuary, Freeport, Papua	NA	NA
Xeno Canto - Naturalis Biodiversity Center	Gavicalis_versicolor	41999	John Dumbacher	2009/10/14	Nare Island, Near Anagusa Island, Engineer Group, Milne Bay Province, Papua New Guinea	-10.7539	151.3137
Xeno Canto - Naturalis Biodiversity Center	Gavicalis_versicolor	41998	John Dumbacher	2009/10/09	Butchart Island, Engineer Group, Milne Bay Province	-10.5739	151.1984
Xeno Canto - Naturalis Biodiversity Center	Gavicalis_versicolor	162239	Henk Krajenbrink	2013/07/24	Portland Roads, Queensland	-12.5962	143.4106
Xeno Canto - Naturalis Biodiversity Center	Gavicalis_fasciogularis	105063	Eliot Miller	2010/10/28	Bowling Green National Park, QLD	-19.4745	147.2242
Xeno Canto - Naturalis Biodiversity Center	Ptilotula_ornata	263829	nick talbot	2015/07/20	Brookfield Conservation Park, SA	-34.3587	139.4873
Xeno Canto - Naturalis Biodiversity Center	Ptilotula_penicillata	269665	Marc Anderson	2015/08/21	Capertee National Park, NSW	-33.0226	150.0369
Xeno Canto - Naturalis Biodiversity Center	Ptilotula_penicillata	269662	Marc Anderson	2015/08/21	Capertee National Park, NSW	-33.0226	150.0369
Xeno Canto - Naturalis Biodiversity Center	Ptilotula_penicillata	201490	Marc Anderson	2014/11/04	Genowlan Rd, Glen Alice, New South Wales	-33.0421	150.1607
Xeno Canto - Naturalis Biodiversity Center	Ptilotula_penicillata	172278	Marc Anderson	2014/03/27	Longreach, Queensland	-23.6153	144.1585
Xeno Canto - Naturalis Biodiversity Center	Ptilotula_penicillata	107946	Matthias Feuersenger	2012/05/22	Sewage Treatment Plant, Exmouth	-21.934	114.134
Xeno Canto - Naturalis Biodiversity Center	Ptilotula_penicillata	241047	Henk Krajenbrink	2013/07/08	Mount Remarkable National Park (near Wilmington), South Australia	-32.8387	138.0397
Xeno Canto - Naturalis Biodiversity Center	Ptilotula_penicillata	94552	Nigel Jackett	2012/01/20	Grenfell	-33.893	148.154
Xeno Canto - Naturalis Biodiversity Center	Ptilotula_fusca	171923	Marc Anderson	2013/10/17	Chiltern, Victoria	-36.1512	146.6093
Xeno Canto - Naturalis Biodiversity Center	Ptilotula_fusca	146628	Marc Anderson	2013/08/31	Capertee Valley, NSW	-33.1214	150.1409
Xeno Canto - Naturalis Biodiversity Center	Ptilotula_fusca	146627	Marc Anderson	2013/08/31	Capertee Valley, NSW	-33.1214	150.1409
Xeno Canto - Naturalis Biodiversity Center	Ptilotula_fusca	146626	Marc Anderson	2013/08/31	Capertee Valley, NSW	-33.1214	150.1409
Xeno Canto - Naturalis Biodiversity Center	Ptilotula_fusca	181641	nick talbot	2014/05/28	Chiltern Box-Ironbark National Park (near Chiltern), Victoria	-36.1383	146.6247
Xeno Canto - Naturalis Biodiversity Center	Stresemannia_bougainvillei	184184	Todd Mark	2014/05/24	2000m Camp, Mt. Balbi, Rotokas, Autonomous Region of Bougainville	-5.9237	155.0197
Xeno Canto - Naturalis Biodiversity Center	Ramsayornis_modestus	158655	Fernand Deroussen	2011/11/03	Alva, Queensland	-19.4619	147.4806
Xeno Canto - Naturalis Biodiversity Center	Ramsayornis_modestus	122088	Bas van Balen	1997/02/12	Amamapare, Freeport, Papua	-4.8228	136.843
Xeno Canto - Naturalis Biodiversity Center	Ramsayornis_modestus	140432	Bas van Balen	2002/04/19	Amamapare, Freeport, Papua	-4.8228	136.843
Xeno Canto - Naturalis Biodiversity Center	Ramsayornis_modestus	104996	Eliot Miller	NA	Lakefield National Park, QLD	-14.6762	143.8378
Xeno Canto - Naturalis Biodiversity Center	Ramsayornis_modestus	158655	Fernand Deroussen	2011/11/03	Alva, Queensland	-19.4619	147.4806
Xeno Canto - Naturalis Biodiversity Center	Ramsayornis_modestus	122088	Bas van Balen	1997/02/12	Amamapare, Freeport, Papua	-4.8228	136.843
Xeno Canto - Naturalis Biodiversity Center	Ramsayornis_modestus	140432	Bas van Balen	2002/04/19	Amamapare, Freeport, Papua	-4.8228	136.843
Xeno Canto - Naturalis Biodiversity Center	Ramsayornis_modestus	104996	Eliot Miller	NA	Lakefield National Park, QLD	-14.6762	143.8378
Xeno Canto - Naturalis Biodiversity Center	Conopophila_albogularis	279277	John V. Moore	1996/08/02	Pacific Adventist University sewage ponds, National Capital Province	-9.405	147.275
Xeno Canto - Naturalis Biodiversity Center	Conopophila_albogularis	140331	Bas van Balen	2002/04/20	Ajkwa Eastuary, Freeport, Papua	NA	NA
Xeno Canto - Naturalis Biodiversity Center	Conopophila_albogularis	24768	Niels Krabbe	2006/12/29	'Bluff Inn Motel', mile 17 from Port Moresby on Sogeri road	-9.4001	147.3167
Xeno Canto - Naturalis Biodiversity Center	Epthianura_crocea	239868	Nigel Jackett	2015/04/29	Roebuck Plains Station, Western Australia	-17.9571	122.4085
Xeno Canto - Naturalis Biodiversity Center	Epthianura_crocea	287806	Phil Gregory	2015/10/25	Lake Argyle, Western Australia	-16.3617	128.7172
Xeno Canto - Naturalis Biodiversity Center	Epthianura_crocea	287805	Phil Gregory	2015/10/25	Lake Argyle, Western Australia	-16.3617	128.7172
Xeno Canto - Naturalis Biodiversity Center	Epthianura_crocea	287803	Phil Gregory	2015/10/25	Lake Argyle, Western Australia	-16.3617	128.7172
Xeno Canto - Naturalis Biodiversity Center	Epthianura_crocea	170146	Bruce Greatwich	2014/02/05	Roebuck, Western Australia	-17.9813	122.3943
Xeno Canto - Naturalis Biodiversity Center	Epthianura_tricolor	44282	Paul Jacobson	2009/09/09	Belah, Gundabooka National Park, NSW	-30.5524678	145.6015921
Xeno Canto - Naturalis Biodiversity Center	Epthianura_tricolor	44282	Paul Jacobson	2009/09/09	Belah, Gundabooka National Park, NSW	-30.5524678	145.6015921
Xeno Canto - Naturalis Biodiversity Center	Epthianura_albifrons	98527	Patrik �berg	2011/12/20	Portarlington, Geelong	-38.1128	144.652
Xeno Canto - Naturalis Biodiversity Center	Epthianura_albifrons	204390	Marc Anderson	2014/11/19	St Helens, Tasmania	-41.316	148.2629
Xeno Canto - Naturalis Biodiversity Center	Epthianura_albifrons	107806	Matthias Feuersenger	2012/05/05	Golf Course, Rottnest Island	-31.9909	115.5359
Xeno Canto - Naturalis Biodiversity Center	Epthianura_albifrons	107805	Matthias Feuersenger	2012/05/05	Golf Course, Rottnest Island	-31.9909	115.5359
Xeno Canto - Naturalis Biodiversity Center	Melipotes_gymnops	62624	Andrew Spencer	2009/07/16	near Camp David, Arfak Mountains, Papua	NA	NA
Xeno Canto - Naturalis Biodiversity Center	Melipotes_gymnops	140744	Bas van Balen	1997/10/19	Manyimbou, Arfak, Papua Barat	-1.1052	133.9673
Xeno Canto - Naturalis Biodiversity Center	Melipotes_fumigatus	156161	Hans Matheve	2009/07/27	Baliem Valley	-4.1337	138.7087
Xeno Canto - Naturalis Biodiversity Center	Melipotes_fumigatus	174588	Marc Anderson	2013/07/25	near Kumul Lodge, Enga province	-5.7667	143.9501
Xeno Canto - Naturalis Biodiversity Center	Melipotes_fumigatus	279367	John V. Moore	1996/08/10	"Ambua Lodge" area, Southern Highlands Province	-5.962	143.067
Xeno Canto - Naturalis Biodiversity Center	Melipotes_fumigatus	140376	Bas van Balen	2002/04/16	Tembagapura, Freeport, Papua	-4.09	137.06
Xeno Canto - Naturalis Biodiversity Center	Melipotes_fumigatus	187285	Phil Gregory	2014/04/23	Ambua Lodge, Southern Highlands	-5.9667	143.0667
Xeno Canto - Naturalis Biodiversity Center	Melipotes_fumigatus	118401	Niels Poul Dreyer	1990/07/07	'Ambua Lodge', Southern Highlands	-9.4667	147.3834
Xeno Canto - Naturalis Biodiversity Center	Melipotes_fumigatus	156161	Hans Matheve	2009/07/27	Baliem Valley	-4.1337	138.7087
Xeno Canto - Naturalis Biodiversity Center	Melipotes_fumigatus	174588	Marc Anderson	2013/07/25	near Kumul Lodge, Enga province	-5.7667	143.9501
Xeno Canto - Naturalis Biodiversity Center	Melipotes_fumigatus	279367	John V. Moore	1996/08/10	"Ambua Lodge" area, Southern Highlands Province	-5.962	143.067
Xeno Canto - Naturalis Biodiversity Center	Melipotes_fumigatus	140376	Bas van Balen	2002/04/16	Tembagapura, Freeport, Papua	-4.09	137.06
Xeno Canto - Naturalis Biodiversity Center	Melipotes_fumigatus	187285	Phil Gregory	2014/04/23	Ambua Lodge, Southern Highlands	-5.9667	143.0667
Xeno Canto - Naturalis Biodiversity Center	Melipotes_fumigatus	118401	Niels Poul Dreyer	1990/07/07	'Ambua Lodge', Southern Highlands	-9.4667	147.3834
Xeno Canto - Naturalis Biodiversity Center	Melipotes_fumigatus	156161	Hans Matheve	2009/07/27	Baliem Valley	-4.1337	138.7087
Xeno Canto - Naturalis Biodiversity Center	Melipotes_fumigatus	174588	Marc Anderson	2013/07/25	near Kumul Lodge, Enga province	-5.7667	143.9501
Xeno Canto - Naturalis Biodiversity Center	Melipotes_fumigatus	279367	John V. Moore	1996/08/10	"Ambua Lodge" area, Southern Highlands Province	-5.962	143.067
Xeno Canto - Naturalis Biodiversity Center	Melipotes_fumigatus	140376	Bas van Balen	2002/04/16	Tembagapura, Freeport, Papua	-4.09	137.06
Xeno Canto - Naturalis Biodiversity Center	Melipotes_fumigatus	187285	Phil Gregory	2014/04/23	Ambua Lodge, Southern Highlands	-5.9667	143.0667
Xeno Canto - Naturalis Biodiversity Center	Melipotes_fumigatus	118401	Niels Poul Dreyer	1990/07/07	'Ambua Lodge', Southern Highlands	-9.4667	147.3834
Xeno Canto - Naturalis Biodiversity Center	Sugomel_nigrum	44281	Paul Jacobson	2009/09/09	Belah, Gundabooka National Park, NSW	-30.5524678	145.6015921
Xeno Canto - Naturalis Biodiversity Center	Sugomel_nigrum	44281	Paul Jacobson	2009/09/09	Belah, Gundabooka National Park, NSW	-30.5524678	145.6015921
Xeno Canto - Naturalis Biodiversity Center	Myzomela_blasii	122021	Todd Mark	2013/02/11	Kanike, Seram, Maluku	-3.1103	129.4797
Xeno Canto - Naturalis Biodiversity Center	Myzomela_blasii	122021	Todd Mark	2013/02/11	Kanike, Seram, Maluku	-3.1103	129.4797
Xeno Canto - Naturalis Biodiversity Center	Myzomela_blasii	122021	Todd Mark	2013/02/11	Kanike, Seram, Maluku	-3.1103	129.4797
Xeno Canto - Naturalis Biodiversity Center	Myzomela_cineracea	246791	Todd Mark	2015/04/15	Walindi Plantation Resort, West New Britain Province	-5.4368	150.0877
Xeno Canto - Naturalis Biodiversity Center	Myzomela_obscura	158687	Fernand Deroussen	2011/11/09	Kingfisher Park, Julatten Atherton Tableland Qld	-16.595	145.34
Xeno Canto - Naturalis Biodiversity Center	Myzomela_obscura	158685	Fernand Deroussen	2011/11/09	Kingfisher Park, Julatten Atherton Tableland Qld	-16.595	145.34
Xeno Canto - Naturalis Biodiversity Center	Myzomela_obscura	170022	Phil Gregory	2014/03/16	Cassowary House, Kuranda, Queensland, Australia	-16.805	145.635
Xeno Canto - Naturalis Biodiversity Center	Myzomela_obscura	170021	Phil Gregory	2014/03/16	Cassowary House, Kuranda, Queensland, Australia	-16.805	145.635
Xeno Canto - Naturalis Biodiversity Center	Myzomela_dammermani	292389	Mike Nelson	2015/07/07	Sumba - forest patch km 51	-9.7369	119.9381
Xeno Canto - Naturalis Biodiversity Center	Myzomela_chloroptera	152085	Mike Nelson	2013/09/25	Gunung Mahawu, Minahasa, North Sulawesi	1.35	124.8664
Xeno Canto - Naturalis Biodiversity Center	Myzomela_wakoloensis	68803	Frank Lambert	1999/01/07	Buru; about 3 km from Danau Rana	-3.36	126.66
Xeno Canto - Naturalis Biodiversity Center	Myzomela_boiei	205056	Mike Nelson	2014/10/17	Babar, Maluku	-7.8797	129.6046
Xeno Canto - Naturalis Biodiversity Center	Myzomela_boiei	138360	Colin Trainor	2011/08/11	Mt Waiwuli near Letwurung, East Babar, Maluku Barat Daya, Maluku	-7.8739	129.8033
Xeno Canto - Naturalis Biodiversity Center	Myzomela_boiei	138359	Colin Trainor	2011/08/11	Mt Waiwuli near Letwurung, East Babar, Maluku Barat Daya, Maluku	-7.8739	129.8033
Xeno Canto - Naturalis Biodiversity Center	Myzomela_caledonica	40141	Patrik �berg	2009/07/01	Parc Provincial de La Riviere bleue, New Caledonia	-22.110293	166.669464
Xeno Canto - Naturalis Biodiversity Center	Myzomela_sanguinolenta	105010	Eliot Miller	2011/12/06	Kaban, QLD	-17.5206	145.4403
Xeno Canto - Naturalis Biodiversity Center	Myzomela_sanguinolenta	104769	Eliot Miller	NA	Mt Lewis, Atherton Tableland, Qld	-16.5389	145.287
Xeno Canto - Naturalis Biodiversity Center	Myzomela_sanguinolenta	156416	Fernand Deroussen	2011/10/28	Mount Charlton, Queensland	-20.9462	148.646
Xeno Canto - Naturalis Biodiversity Center	Myzomela_cardinalis	40083	Patrik �berg	2009/07/01	Lifou, New Caledonia	-21.042049	167.23938
Xeno Canto - Naturalis Biodiversity Center	Myzomela_cardinalis	40083	Patrik �berg	2009/07/01	Lifou, New Caledonia	-21.042049	167.23938
Xeno Canto - Naturalis Biodiversity Center	Myzomela_pammelaena	169632	Todd Mark	2014/02/19	Tsoilik, New Hanover	-2.4187	150.4156
Xeno Canto - Naturalis Biodiversity Center	Myzomela_melanocephala	283810	Frank Lambert	2015/09/12	Chupukama Ridge Guadalcanal 1400m	-9.639	160.0683
Xeno Canto - Naturalis Biodiversity Center	Myzomela_tristrami	33041	Niels Krabbe	2006/12/04	Baranaigasi Ridge, Makira	-10.5667	161.8167
Xeno Canto - Naturalis Biodiversity Center	Myzomela_jugularis	75688	Todd Mark	NA	near Colo-I-Suva, Viti Levu, Fiji	-18.012	178.409
Xeno Canto - Naturalis Biodiversity Center	Myzomela_jugularis	75688	Todd Mark	NA	near Colo-I-Suva, Viti Levu, Fiji	-18.012	178.409
Xeno Canto - Naturalis Biodiversity Center	Myzomela_vulnerata	292404	Mike Nelson	2015/07/13	Gunung Mutis, Timor	-9.5667	124.2334
Xeno Canto - Naturalis Biodiversity Center	Myzomela_vulnerata	68807	Frank Lambert	2005/05/14	Melihara, near Los Palos	-8.5	127
Xeno Canto - Naturalis Biodiversity Center	Myzomela_vulnerata	68806	Frank Lambert	2005/05/14	Melihara, near Los Palos	-8.5	127
Xeno Canto - Naturalis Biodiversity Center	Myzomela_rosenbergii	156069	Hans Matheve	2009/07/28	Baliem Valley	-4.1337	138.7087
Xeno Canto - Naturalis Biodiversity Center	Myzomela_rosenbergii	167015	Frank Lambert	2013/07/21	Papua Barat, top of Baliem Valley, Lake Habbema trek	-4.1323	138.7138
Xeno Canto - Naturalis Biodiversity Center	Myzomela_rosenbergii	156069	Hans Matheve	2009/07/28	Baliem Valley	-4.1337	138.7087
Xeno Canto - Naturalis Biodiversity Center	Myzomela_rosenbergii	167015	Frank Lambert	2013/07/21	Papua Barat, top of Baliem Valley, Lake Habbema trek	-4.1323	138.7138
Xeno Canto - Naturalis Biodiversity Center	Gliciphila_melanops	134382	Marc Anderson	2012/08/23	Bulli Tops, New South Wales	-34.2447	150.9169
Xeno Canto - Naturalis Biodiversity Center	Gliciphila_melanops	98494	Patrik �berg	2012/01/06	Strahan, Tas	-42.1759	145.282
Xeno Canto - Naturalis Biodiversity Center	Gliciphila_melanops	166675	John Graff	2013/12/02	Kulunilup Swamp, Western Australia	-34.3477	116.789
Xeno Canto - Naturalis Biodiversity Center	Gliciphila_melanops	134382	Marc Anderson	2012/08/23	Bulli Tops, New South Wales	-34.2447	150.9169
Xeno Canto - Naturalis Biodiversity Center	Gliciphila_melanops	98494	Patrik �berg	2012/01/06	Strahan, Tas	-42.1759	145.282
Xeno Canto - Naturalis Biodiversity Center	Gliciphila_melanops	166675	John Graff	2013/12/02	Kulunilup Swamp, Western Australia	-34.3477	116.789
Xeno Canto - Naturalis Biodiversity Center	Ptiloprora_meekiana	279345	John V. Moore	1996/08/11	"Ambua Lodge" area, Southern Highlands Province	-5.962	143.067
Xeno Canto - Naturalis Biodiversity Center	Ptiloprora_meekiana	176051	Phil Gregory	2014/04/20	Mount Hagen, Dei District, Western Highlands Province	-5.8537	144.2615
Xeno Canto - Naturalis Biodiversity Center	Ptiloprora_guisei	279399	John V. Moore	1996/08/13	"Ambua Lodge" area, Southern Highlands Province	-5.962	143.067
Xeno Canto - Naturalis Biodiversity Center	Ptiloprora_guisei	26776	Niels Krabbe	2006/12/25	'Ambua Lodge', Southern Highlands	-5.9667	143.0667
Xeno Canto - Naturalis Biodiversity Center	Ptiloprora_guisei	26775	Niels Krabbe	2006/12/24	'Warili Lodge' near Tari, Southern Highlands	-5.9667	143.0501
Xeno Canto - Naturalis Biodiversity Center	Ptiloprora_guisei	279318	John V. Moore	1996/08/07	Ok Tedi Mine high, Tabubil, Western Province	-5.207	141.132
Xeno Canto - Naturalis Biodiversity Center	Ptiloprora_guisei	276901	Phil Gregory	2015/08/27	Ambua Lodge, Southern Highlands	-5.9667	143.0667
Xeno Canto - Naturalis Biodiversity Center	Ptiloprora_guisei	170620	Juha Honkala	2010/09/17	Tari Gap, above 'Ambua Lodge', Southern Highlands	-5.9603	143.1545
Xeno Canto - Naturalis Biodiversity Center	Ptiloprora_guisei	87562	Iain Woxvold	2008/04/04	Maruba River, Southern Highlands Province	-6.0967	143.1045
Xeno Canto - Naturalis Biodiversity Center	Ptiloprora_guisei	118777	Niels Poul Dreyer	1990/07/18	7 corners, near Tari Gap, Southern Highlands	-5.9667	143.1334
Xeno Canto - Naturalis Biodiversity Center	Ptiloprora_perstriata	279388	John V. Moore	1996/08/13	"Ambua Lodge" area, Southern Highlands Province	-5.962	143.067
Xeno Canto - Naturalis Biodiversity Center	Ptiloprora_perstriata	155610	Hans Matheve	2009/07/24	Baliem Valley	-4.1337	138.7087
Xeno Canto - Naturalis Biodiversity Center	Ptiloprora_perstriata	155609	Hans Matheve	2009/07/24	Baliem Valley	-4.1337	138.7087
Xeno Canto - Naturalis Biodiversity Center	Ptiloprora_perstriata	26806	Niels Krabbe	2006/12/26	7 corners, near Tari Gap, Southern Highlands	-5.9667	143.1334
Xeno Canto - Naturalis Biodiversity Center	Ptiloprora_perstriata	26805	Niels Krabbe	2006/12/26	7 corners, near Tari Gap, Southern Highlands	-5.9667	143.1334
Xeno Canto - Naturalis Biodiversity Center	Ptiloprora_perstriata	26377	Frank Lambert	2002/06/16	Lake Habbema trek, Snow Mountains, Papua	-4.1081	138.7214
Xeno Canto - Naturalis Biodiversity Center	Ptiloprora_perstriata	22776	Mike Catsis	2008/08/08	Kumul Lodge, Enga province	-5.7912	143.9706
Xeno Canto - Naturalis Biodiversity Center	Ptiloprora_perstriata	18881	Nick Athanas	2007/06/24	Kumul Lodge, Enga province	-5.7912	143.9706
Xeno Canto - Naturalis Biodiversity Center	Ptiloprora_perstriata	26807	Niels Krabbe	2006/12/28	7 corners, near Tari Gap, Southern Highlands	-5.9667	143.1334
Xeno Canto - Naturalis Biodiversity Center	Ptiloprora_perstriata	26804	Niels Krabbe	2006/12/25	7 corners, near Tari Gap, Southern Highlands	-5.9667	143.1334
Xeno Canto - Naturalis Biodiversity Center	Ptiloprora_perstriata	26378	Frank Lambert	2002/06/16	Lake Habbema trek, Snow Mountains, Papua	-4.1081	138.7214
Xeno Canto - Naturalis Biodiversity Center	Lichmera_lombokia	31392	Allen T. Chartier	1997/08/12	Flores, Ruteng	-8.6334	120.5601
Xeno Canto - Naturalis Biodiversity Center	Lichmera_argentauris	37830	Mike Catsis	2009/08/03	Lusaolate Island, off Sawai, Seram, Maluku	NA	NA
Xeno Canto - Naturalis Biodiversity Center	Lichmera_argentauris	37828	Mike Catsis	2009/08/03	Lusaolate Island, off Sawai, Seram, Maluku	NA	NA
Xeno Canto - Naturalis Biodiversity Center	Lichmera_indistincta	131086	Colin Trainor	2013/04/22	Nightcliff, Northern Territory	-12.379	130.8432
Xeno Canto - Naturalis Biodiversity Center	Lichmera_indistincta	105066	Eliot Miller	2010/10/28	Bowling Green National Park, QLD	-19.4745	147.2242
Xeno Canto - Naturalis Biodiversity Center	Lichmera_limbata	40059	Patrik �berg	2009/07/10	Bali Botanical Gardens, Bali	-8.2785	115.153413
Xeno Canto - Naturalis Biodiversity Center	Lichmera_limbata	38512	Matthias Feuersenger	2009/08/04	Bali Botanical Gardens, Candikuning, Bali	-8.2785	115.1534
Xeno Canto - Naturalis Biodiversity Center	Lichmera_limbata	204596	Mike Nelson	2014/10/09	Pantar Island, near Bagang	-8.3556	124.1333
Xeno Canto - Naturalis Biodiversity Center	Lichmera_incana	234140	Mark O'Brien	2015/02/27	Sarram�a, Province Sud	-21.6502	165.7791
Xeno Canto - Naturalis Biodiversity Center	Lichmera_squamata	202689	Frank Lambert	2013/10/13	Tanimbar, nr Kormomolin, Yamdena Island, Maluku	-7.7969	131.388
Xeno Canto - Naturalis Biodiversity Center	Lichmera_squamata	156501	Frank Lambert	2013/10/21	Wetar, near Naumatong Village, Maluku	-7.6946	126.2763
Xeno Canto - Naturalis Biodiversity Center	Lichmera_squamata	122146	Frank Lambert	2012/08/20	Tanimbar Islands: site 3 (approx location)	-7.7838	131.2629
Xeno Canto - Naturalis Biodiversity Center	Lichmera_squamata	205171	Mike Nelson	2014/10/21	Yamdena, West Maluku Tenggara, Maluku	-7.8679	131.2988
Xeno Canto - Naturalis Biodiversity Center	Lichmera_squamata	205170	Mike Nelson	2014/10/21	Yamdena, West Maluku Tenggara, Maluku	-7.8679	131.2988
Xeno Canto - Naturalis Biodiversity Center	Lichmera_squamata	205169	Mike Nelson	2014/10/20	Yamdena, West Maluku Tenggara, Maluku	-7.8679	131.2988
Xeno Canto - Naturalis Biodiversity Center	Lichmera_squamata	121849	Frank Lambert	2012/08/18	Tanimbar Islands: Site 1 Yamdena, Maluku	-7.7803	131.4034
Xeno Canto - Naturalis Biodiversity Center	Lichmera_squamata	38353	Mike Catsis	2009/07/24	Lorulun Farm 21 km north of Saumlaki, Yamdena, Tanimbar Islands, Maluku	-7.840935	131.307907
Xeno Canto - Naturalis Biodiversity Center	Lichmera_alboauricularis	140697	Bas van Balen	2000/09/05	Dabra, Southern Mamberamo basin, Papua	-2.9124	138.3838
Xeno Canto - Naturalis Biodiversity Center	Lichmera_alboauricularis	140697	Bas van Balen	2000/09/05	Dabra, Southern Mamberamo basin, Papua	-2.9124	138.3838
Xeno Canto - Naturalis Biodiversity Center	Lichmera_flavicans	292403	Mike Nelson	2015/06/21	Gunung Mutis, Timor	-9.5667	124.2334
Xeno Canto - Naturalis Biodiversity Center	Lichmera_flavicans	68566	Frank Lambert	1999/04/26	Timor Barat, Gunung Mutis	-9.56	124.23
Xeno Canto - Naturalis Biodiversity Center	Lichmera_flavicans	32696	Colin Trainor	2008/05/17	Mt Laritame, Ossu, Baucau	-8.68722	126.38806
Xeno Canto - Naturalis Biodiversity Center	Phylidonyris_pyrrhopterus	263799	Greg McLachlan	2015/04/18	Waterfall, New South Wales	-34.145	151.0038
Xeno Canto - Naturalis Biodiversity Center	Phylidonyris_pyrrhopterus	204471	Marc Anderson	2014/11/20	Mount Field National Park (near Mount Field), Tasmania	-42.697	146.6718
Xeno Canto - Naturalis Biodiversity Center	Phylidonyris_pyrrhopterus	172243	Marc Anderson	2013/10/26	Newnes Plateau, New South Wales	-33.3439	150.2245
Xeno Canto - Naturalis Biodiversity Center	Phylidonyris_pyrrhopterus	96995	Patrik �berg	2012/01/05	Derwent Bridge, Walls of Jerusalem NP Tas	-42.1348	146.2298
Xeno Canto - Naturalis Biodiversity Center	Phylidonyris_pyrrhopterus	40850	Mark Harper	2009/11/05	South Bruny Island, TAS	-43.4467	147.2548
Xeno Canto - Naturalis Biodiversity Center	Phylidonyris_pyrrhopterus	123439	Judith Lattaway	2013/01/13	Lake St Clair, Tasmania	-42.1168	146.1782
Xeno Canto - Naturalis Biodiversity Center	Phylidonyris_novaehollandiae	171960	Marc Anderson	2013/11/24	Barren Grounds, New South Wales	-34.6757	150.7072
Xeno Canto - Naturalis Biodiversity Center	Phylidonyris_novaehollandiae	171959	Marc Anderson	2013/11/24	Barren Grounds, New South Wales	-34.6757	150.7072
Xeno Canto - Naturalis Biodiversity Center	Trichodere_cockerelli	104972	Eliot Miller	NA	Iron Range National Park, QLD	-12.6739	143.3353
Xeno Canto - Naturalis Biodiversity Center	Trichodere_cockerelli	104970	Eliot Miller	NA	Iron Range National Park, QLD	-12.6739	143.3353
Xeno Canto - Naturalis Biodiversity Center	Trichodere_cockerelli	104969	Eliot Miller	NA	Iron Range National Park, QLD	-12.6739	143.3353
Xeno Canto - Naturalis Biodiversity Center	Nesoptilotis_leucotis	201472	Marc Anderson	2014/11/04	Dunn's Swamp, near Rylstone, NSW	-32.8334	150.2001
Xeno Canto - Naturalis Biodiversity Center	Nesoptilotis_leucotis	172256	Marc Anderson	2013/06/12	Kanangra, New South Wales	-33.9637	150.0896
Xeno Canto - Naturalis Biodiversity Center	Nesoptilotis_leucotis	146644	Marc Anderson	2013/08/31	Newnes Plateau, New South Wales	-33.3919	150.2096
Xeno Canto - Naturalis Biodiversity Center	Nesoptilotis_leucotis	186227	nick talbot	2013/01/27	Cowes, Victoria	-38.473	145.2334
Xeno Canto - Naturalis Biodiversity Center	Nesoptilotis_flavicollis	204462	Marc Anderson	2014/11/18	Ansons Bay, Tasmania	-41.1117	148.2602
Xeno Canto - Naturalis Biodiversity Center	Nesoptilotis_flavicollis	204461	Marc Anderson	2014/11/18	Ansons Bay, Tasmania	-41.1117	148.2602
Xeno Canto - Naturalis Biodiversity Center	Nesoptilotis_flavicollis	98611	Patrik �berg	2012/01/05	Derwent Bridge, Walls of Jerusalem NP Tas	-42.1348	146.2298
Xeno Canto - Naturalis Biodiversity Center	Nesoptilotis_flavicollis	98608	Patrik �berg	2012/01/05	Derwent Bridge, Walls of Jerusalem NP Tas	-42.1348	146.2298
Xeno Canto - Naturalis Biodiversity Center	Nesoptilotis_flavicollis	98607	Patrik �berg	2012/01/05	Derwent Bridge, Walls of Jerusalem NP Tas	-42.1348	146.2298
Xeno Canto - Naturalis Biodiversity Center	Entomyzon_cyanotis	158679	Fernand Deroussen	2011/11/05	Mary Farms, Queensland	-16.5686	145.183
Xeno Canto - Naturalis Biodiversity Center	Melithreptus_brevirostris	286940	Marc Anderson	2015/10/14	Bowra Station, near Cunnamulla, Queensland	-27.9633	145.5848
Xeno Canto - Naturalis Biodiversity Center	Melithreptus_brevirostris	104884	Eliot Miller	NA	Mogo Creek, Yengo National Park, New South Wales	-33.1659	151.0648
Xeno Canto - Naturalis Biodiversity Center	Melithreptus_brevirostris	104883	Eliot Miller	NA	Mogo Creek, Yengo National Park, New South Wales	-33.1659	151.0648
Xeno Canto - Naturalis Biodiversity Center	Melithreptus_validirostris	204401	Marc Anderson	2014/11/20	South Bruny, Tasmania	-43.4587	147.1536
Xeno Canto - Naturalis Biodiversity Center	Meliarchus_sclateri	32971	Niels Krabbe	2006/11/30	Baranaigasi Ridge, Makira	-10.5667	161.8167
Xeno Canto - Naturalis Biodiversity Center	Meliarchus_sclateri	32969	Niels Krabbe	2006/11/30	Baranaigasi Ridge, Makira	-10.5667	161.8167
Xeno Canto - Naturalis Biodiversity Center	Meliarchus_sclateri	32987	Niels Krabbe	2006/12/09	lower Baranaigasi Ridge, Makira	-10.5501	161.8501
Xeno Canto - Naturalis Biodiversity Center	Meliarchus_sclateri	32974	Niels Krabbe	2006/12/03	Baranaigasi Ridge, Makira	-10.5667	161.8167
Xeno Canto - Naturalis Biodiversity Center	Meliarchus_sclateri	32967	Niels Krabbe	2006/11/30	Baranaigasi Ridge, Makira	-10.5667	161.8167
Xeno Canto - Naturalis Biodiversity Center	Guadalcanaria_inexpectata	290375	Frank Lambert	2015/09/17	Chupukama Ridge Guadalcanal 1470m	-9.6414	160.069
Xeno Canto - Naturalis Biodiversity Center	Guadalcanaria_inexpectata	284246	Frank Lambert	2015/09/15	Chupukama Ridge Guadalcanal 1400m	-9.639	160.0683
Xeno Canto - Naturalis Biodiversity Center	Guadalcanaria_inexpectata	290375	Frank Lambert	2015/09/17	Chupukama Ridge Guadalcanal 1470m	-9.6414	160.069
Xeno Canto - Naturalis Biodiversity Center	Guadalcanaria_inexpectata	284246	Frank Lambert	2015/09/15	Chupukama Ridge Guadalcanal 1400m	-9.639	160.0683
Xeno Canto - Naturalis Biodiversity Center	Foulehaio_carunculatus	108857	Matthias Feuersenger	2012/06/05	Abaca, Waterfall Track, Koroyanitu Heritage Park, Viti Levu	-17.668	177.547
Xeno Canto - Naturalis Biodiversity Center	Foulehaio_carunculatus	77350	Mark O'Brien	2010/10/02	Nakobelevu	-18.047	178.428
Xeno Canto - Naturalis Biodiversity Center	Foulehaio_carunculatus	77354	Mark O'Brien	2010/07/12	Pacific Harbour	-18.253	178.072
Xeno Canto - Naturalis Biodiversity Center	Foulehaio_carunculatus	108857	Matthias Feuersenger	2012/06/05	Abaca, Waterfall Track, Koroyanitu Heritage Park, Viti Levu	-17.668	177.547
Xeno Canto - Naturalis Biodiversity Center	Foulehaio_carunculatus	77350	Mark O'Brien	2010/10/02	Nakobelevu	-18.047	178.428
Xeno Canto - Naturalis Biodiversity Center	Foulehaio_carunculatus	77354	Mark O'Brien	2010/07/12	Pacific Harbour	-18.253	178.072
Xeno Canto - Naturalis Biodiversity Center	Xanthotis_flaviventer	140448	Bas van Balen	2002/04/09	East Levee, Freeport, Papua	-4.6202	136.983
Xeno Canto - Naturalis Biodiversity Center	Xanthotis_flaviventer	87575	Iain Woxvold	2008/02/19	Carrington Headwaters, Western Province	-5.902	142.4362
Xeno Canto - Naturalis Biodiversity Center	Xanthotis_flaviventer	140448	Bas van Balen	2002/04/09	East Levee, Freeport, Papua	-4.6202	136.983
Xeno Canto - Naturalis Biodiversity Center	Xanthotis_flaviventer	87575	Iain Woxvold	2008/02/19	Carrington Headwaters, Western Province	-5.902	142.4362
Xeno Canto - Naturalis Biodiversity Center	Xanthotis_macleayanus	175870	Adrian Walsh	2014/04/23	Malanda, Queensland	-17.356	145.587
Xeno Canto - Naturalis Biodiversity Center	Xanthotis_macleayanus	174193	Marc Anderson	2013/11/06	Koah, Queensland	-16.9112	145.6001
Xeno Canto - Naturalis Biodiversity Center	Xanthotis_macleayanus	143428	Phil Gregory	2013/07/24	Cassowary House, Kuranda, Queensland, Australia	-16.805	145.635
Xeno Canto - Naturalis Biodiversity Center	Xanthotis_macleayanus	105077	Eliot Miller	2010/12/05	Kingfisher Park Julatten, Atherton Tableland Qld	-16.607	145.3428
Xeno Canto - Naturalis Biodiversity Center	Xanthotis_macleayanus	105076	Eliot Miller	2010/12/05	Kingfisher Park Julatten, Atherton Tableland Qld	-16.607	145.3428
Xeno Canto - Naturalis Biodiversity Center	Xanthotis_macleayanus	158677	Fernand Deroussen	2011/11/03	Yungaburra, Queensland	-17.2725	145.5927
Xeno Canto - Naturalis Biodiversity Center	Plectorhyncha_lanceolata	172027	Marc Anderson	2013/11/21	Capertee River, NSW	-33.046	150.162
Xeno Canto - Naturalis Biodiversity Center	Plectorhyncha_lanceolata	171817	Marc Anderson	2013/10/10	Euabalong, New South Wales	-32.9494	146.1216
Xeno Canto - Naturalis Biodiversity Center	Plectorhyncha_lanceolata	30865	Vicki Powys	1999/09/03	Capertee Valley, NSW	-33.1214	150.1409
Xeno Canto - Naturalis Biodiversity Center	Grantiella_picta	172028	Marc Anderson	2013/11/21	Capertee River, NSW	-33.046	150.162
Xeno Canto - Naturalis Biodiversity Center	Grantiella_picta	154409	Yong Ding Li	2013/11/14	Stony Creek Nature Reserve, Australian Capital Territory	-35.2552	148.9459
Xeno Canto - Naturalis Biodiversity Center	Grantiella_picta	153790	Yong Ding Li	2013/11/10	Stony Creek Nature Reserve, Australian Capital Territory	-35.2552	148.9459
Xeno Canto - Naturalis Biodiversity Center	Philemon_citreogularis	287328	Marc Anderson	2015/10/13	Bowra Station, near Cunnamulla, Queensland	-27.9633	145.5848
Xeno Canto - Naturalis Biodiversity Center	Philemon_citreogularis	287046	Marc Anderson	2015/10/15	Bowra Station, near Cunnamulla, Queensland	-27.9633	145.5848
Xeno Canto - Naturalis Biodiversity Center	Philemon_citreogularis	287045	Marc Anderson	2015/10/15	Bowra Station, near Cunnamulla, Queensland	-27.9633	145.5848
Xeno Canto - Naturalis Biodiversity Center	Philemon_citreogularis	287044	Marc Anderson	2015/10/15	Bowra Station, near Cunnamulla, Queensland	-27.9633	145.5848
Xeno Canto - Naturalis Biodiversity Center	Philemon_meyeri	140912	Bas van Balen	2007/05/14	Waropen Atas, Papua	-1.6225	137.7301
Xeno Canto - Naturalis Biodiversity Center	Philemon_meyeri	140910	Bas van Balen	2007/05/01	Waropen Atas, Papua	-1.6225	137.7301
Xeno Canto - Naturalis Biodiversity Center	Philemon_inornatus	288967	JACOB Herv�	2015/09/26	oelnasi Timor	-9.8721	124.2097
Xeno Canto - Naturalis Biodiversity Center	Philemon_inornatus	36766	Colin Trainor	2004/11/26	Assalaino, Lautem	-8.4001	127.0145
Xeno Canto - Naturalis Biodiversity Center	Philemon_inornatus	36765	Colin Trainor	2004/11/26	Assalaino, Lautem	-8.4001	127.0145
Xeno Canto - Naturalis Biodiversity Center	Philemon_inornatus	292402	Mike Nelson	2015/06/21	Gunung Mutis, Timor	-9.5667	124.2334
Xeno Canto - Naturalis Biodiversity Center	Philemon_inornatus	32693	Colin Trainor	2008/05/17	Mt Laritame, Ossu, Baucau	-8.68722	126.38806
Xeno Canto - Naturalis Biodiversity Center	Philemon_kisserensis	204906	Mike Nelson	2014/10/14	Leti Moa Lakor, Maluku Barat Daya, Maluku	-8.1646	127.6883
Xeno Canto - Naturalis Biodiversity Center	Philemon_kisserensis	204905	Mike Nelson	2014/10/14	Leti Moa Lakor, Maluku Barat Daya, Maluku	-8.1646	127.6883
Xeno Canto - Naturalis Biodiversity Center	Philemon_kisserensis	204904	Mike Nelson	2014/10/14	Leti Moa Lakor, Maluku Barat Daya, Maluku	-8.1646	127.6883
Xeno Canto - Naturalis Biodiversity Center	Philemon_kisserensis	204902	Mike Nelson	2014/10/14	Leti Moa Lakor, Maluku Barat Daya, Maluku	-8.1646	127.6883
Xeno Canto - Naturalis Biodiversity Center	Philemon_kisserensis	204906	Mike Nelson	2014/10/14	Leti Moa Lakor, Maluku Barat Daya, Maluku	-8.1646	127.6883
Xeno Canto - Naturalis Biodiversity Center	Philemon_kisserensis	204905	Mike Nelson	2014/10/14	Leti Moa Lakor, Maluku Barat Daya, Maluku	-8.1646	127.6883
Xeno Canto - Naturalis Biodiversity Center	Philemon_kisserensis	204904	Mike Nelson	2014/10/14	Leti Moa Lakor, Maluku Barat Daya, Maluku	-8.1646	127.6883
Xeno Canto - Naturalis Biodiversity Center	Philemon_kisserensis	204902	Mike Nelson	2014/10/14	Leti Moa Lakor, Maluku Barat Daya, Maluku	-8.1646	127.6883
Xeno Canto - Naturalis Biodiversity Center	Philemon_fuscicapillus	196595	Frank Lambert	2014/09/07	Morotai, c km3 north of Sidowa, North Maluku	2.1402	128.5654
Xeno Canto - Naturalis Biodiversity Center	Philemon_fuscicapillus	194920	Marc Thibault	2014/07/05	East Morotai, Morotai Island, North Maluku	2.2016	128.5124
Xeno Canto - Naturalis Biodiversity Center	Philemon_moluccensis	69039	Frank Lambert	1998/03/21	Kai Besar	-5.65	133.01
Xeno Canto - Naturalis Biodiversity Center	Philemon_subcorniculatus	127393	Frank Lambert	2012/08/23	Seram: Trans-Seram Highway, below pass towards north coast	-3.0525	129.1617
Xeno Canto - Naturalis Biodiversity Center	Philemon_subcorniculatus	127393	Frank Lambert	2012/08/23	Seram: Trans-Seram Highway, below pass towards north coast	-3.0525	129.1617
Xeno Canto - Naturalis Biodiversity Center	Philemon_buceroides	102906	Colin Trainor	2009/11/30	Lewoleba, Lembata, Nusa Tenggara	-8.382	123.3859
Xeno Canto - Naturalis Biodiversity Center	Philemon_buceroides	109554	Colin Trainor	2012/08/09	Pintumas, Alor Island	-8.2834	124.5501
Xeno Canto - Naturalis Biodiversity Center	Philemon_buceroides	292556	Mike Nelson	2015/06/25	Danau Rana Mese, Flores	-8.642	120.5592
Xeno Canto - Naturalis Biodiversity Center	Philemon_buceroides	204584	Mike Nelson	2014/10/09	Pantar Island, near Bagang	-8.3556	124.1333
Xeno Canto - Naturalis Biodiversity Center	Philemon_buceroides	166708	Frank Lambert	2012/11/14	Gunung Rinjani, above Senaru, Lombok, West Nusa Tenggara	-8.3235	116.4012
Xeno Canto - Naturalis Biodiversity Center	Philemon_buceroides	166707	Frank Lambert	2012/11/14	Gunung Rinjani, above Senaru, Lombok, West Nusa Tenggara	-8.3235	116.4012
Xeno Canto - Naturalis Biodiversity Center	Philemon_albitorques	24643	Frank Lambert	2008/09/05	Manus Island, Admiralty Islands, Bismarck Archipelago	-2.0834	147.01
Xeno Canto - Naturalis Biodiversity Center	Philemon_albitorques	42023	John Dumbacher	2009/03/15	On Road between Lorengau and Rossim - side road to Waterfall and water intake on the Lorengau River, for the town of Lorengau, and land of Kepo Pomat along the side road; Manus Island, Manus Province,	-2.0381	147.2631
Xeno Canto - Naturalis Biodiversity Center	Philemon_argenticeps	126452	Sandra V. Valderrama	2012/05/31	Mornington Wildlife Sanctuary	-17.5162	126.0751
Xeno Canto - Naturalis Biodiversity Center	Philemon_corniculatus	184077	Marc Anderson	2013/12/27	Genowlan Rd, Glen Alice, New South Wales	-33.0421	150.1607
Xeno Canto - Naturalis Biodiversity Center	Philemon_corniculatus	104905	Eliot Miller	NA	Mogo Creek, Yengo National Park, New South Wales	-33.1659	151.0648
Xeno Canto - Naturalis Biodiversity Center	Philemon_corniculatus	104904	Eliot Miller	NA	Mogo Creek, Yengo National Park, New South Wales	-33.1659	151.0648
Xeno Canto - Naturalis Biodiversity Center	Philemon_corniculatus	158680	Fernand Deroussen	2011/11/05	Mary Farms, Queensland	-16.5686	145.183
Xeno Canto - Naturalis Biodiversity Center	Philemon_diemenensis	234139	Mark O'Brien	2015/02/27	Sarram�a, Province Sud	-21.6502	165.7791
Macaulay Library - Cornell Lab of Ornithology	Caligavis_chrysops	198103
Xeno Canto - Naturalis Biodiversity Center	Glycifohia_undulata	278987	George Wagner	2015/09/01		-22.1443	166.8937
Xeno Canto - Naturalis Biodiversity Center	Glycifohia_undulata	40080	Patrik ?berg	2009/07/01		-22.110293	166.669464
Xeno Canto - Naturalis Biodiversity Center	Glycifohia_undulata	40081	Patrik ?berg	2009/07/01		-22.110293	166.669464
Xeno Canto - Naturalis Biodiversity Center	Gymnomyza_viridis	148521	Phil Gregory	2013/09/15	Des Vouex Peak Road	-16.832	-179.977
Macaulay Library - Cornell Lab of Ornithology	Lichmera_indistincta	188295
Xeno Canto - Naturalis Biodiversity Center	Melithreptus_albogularis	167899	Adrian Walsh	2014/02/23	Yorkeys Knob, Queensland	-16.8119	145.7276
Xeno Canto - Naturalis Biodiversity Center	Philemon_buceroides	140410	Bas van Balen	2002/04/13		-4.487	136.8828
Macaulay Library - Cornell Lab of Ornithology	Foulehaio_carunculatus	140750	Mittermeier, John C	2005/07/30	S of Mata o le Afi, A'opo Cloud Forest Conservation Area	-13.6104	-172.5061833
Xeno Canto - Naturalis Biodiversity Center	Philemon_novaeguineae	155274	Neil Hermes	2011/07/30		-5.225	145.7915
Xeno Canto - Naturalis Biodiversity Center	Philemon_yorki	176407	Phil Gregory	2014/04/28		-16.805	145.635
Xeno Canto - Naturalis Biodiversity Center	Philemon_novaeguineae	215291	Patrik ?berg	2014/12/27		-0.242	131.0253
Xeno Canto - Naturalis Biodiversity Center	Philemon_yorki	277669	Krzysztof Deoniziak	2015/08/10		-16.921	145.7674
Xeno Canto - Naturalis Biodiversity Center	Philemon_novaeguineae	40336	Patrik ?berg	2009/07/23		-0.8959	130.6678
Xeno Canto - Naturalis Biodiversity Center	Philemon_yorki	98182	Patrik ?berg	2011/12/21		-16.884	145.765
Xeno Canto - Naturalis Biodiversity Center	Philemon_plumigenys	205185	Mike Nelson	2014/10/21		-7.8679	131.2988
Xeno Canto - Naturalis Biodiversity Center	Philemon_plumigenys	205186	Mike Nelson	2014/10/21		-7.8679	131.2988
Australian National Wildlife Collection - CSIRO	Ptilotula_keartlandi	4568	Dave Stewart	1982/08/08	Gorge Creek 25kms East Mount Isa	-20.75	139.6333
