# Supplementary material for: Evolution of a multifunctional trait: shared effects of foraging ecology and thermoregulation on beak morphology, with consequences for song evolution
Source: PubMed Central journal article supplement (PMC6939928; doi:10.1098/rspb.2019.2474), 2019-12-18
Supplement: rspb20192474supp1.pdf [file rspb20192474supp1.pdf]

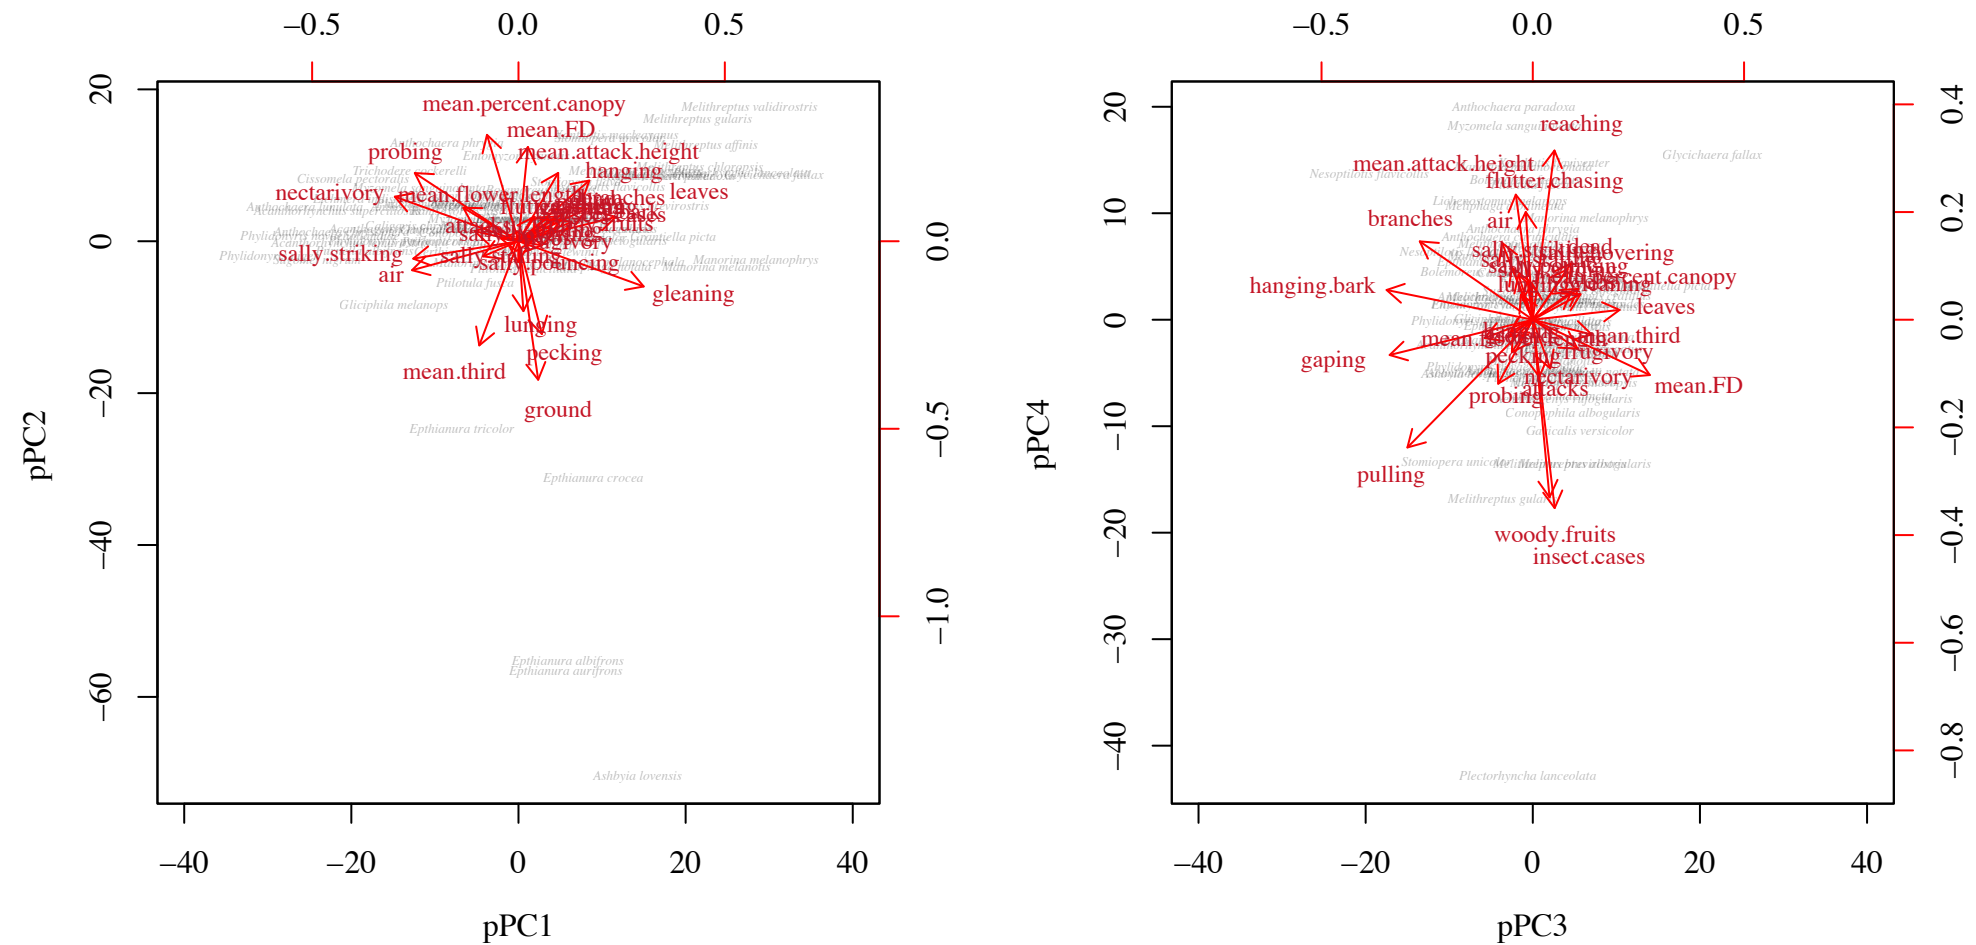

Figure S1: Biplots of phylogenetically-corrected Principal Component Analysis for observations of foraging behavior in honeyeater species. Species names are given at their PC value coordinates. PC loadings for each foraging variable are described as arrows.

PC3

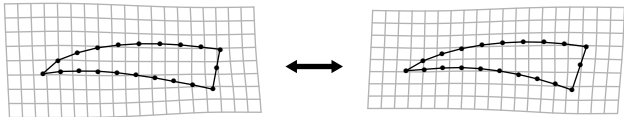

Figure S2: Warp grids illustrating the extremes of beak shape PC axis 3, which is described in the text as “tapering”.

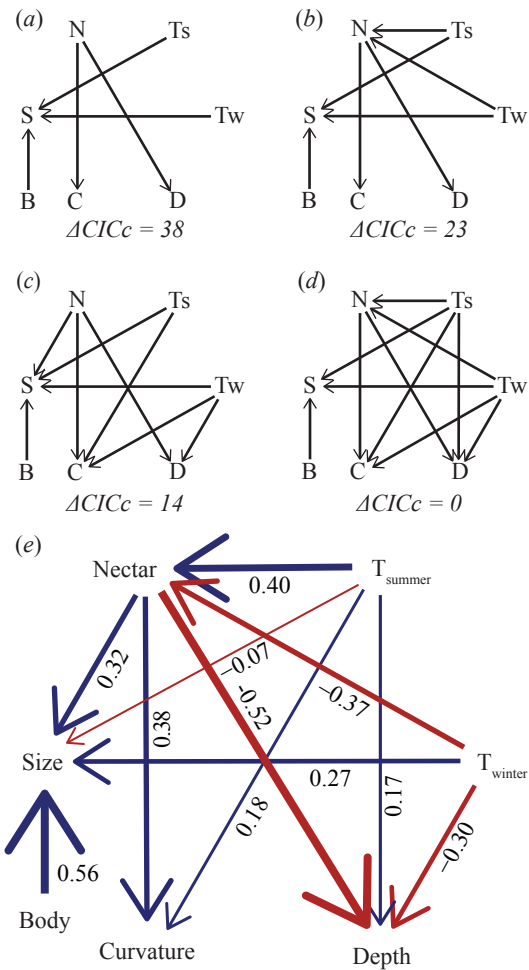

Figure S3: Phylogenetically-corrected path analyses were repeated using body size as a covariate. Format follows Figure 2. Model fit is assessed by the C-statistic information criterion (CICc) following [61]. The best fitting model is shown in (e), with red arrows indicating negative associations and blue arrows indicating positive ones; values shown below each arrow refer to correlation coefficients.

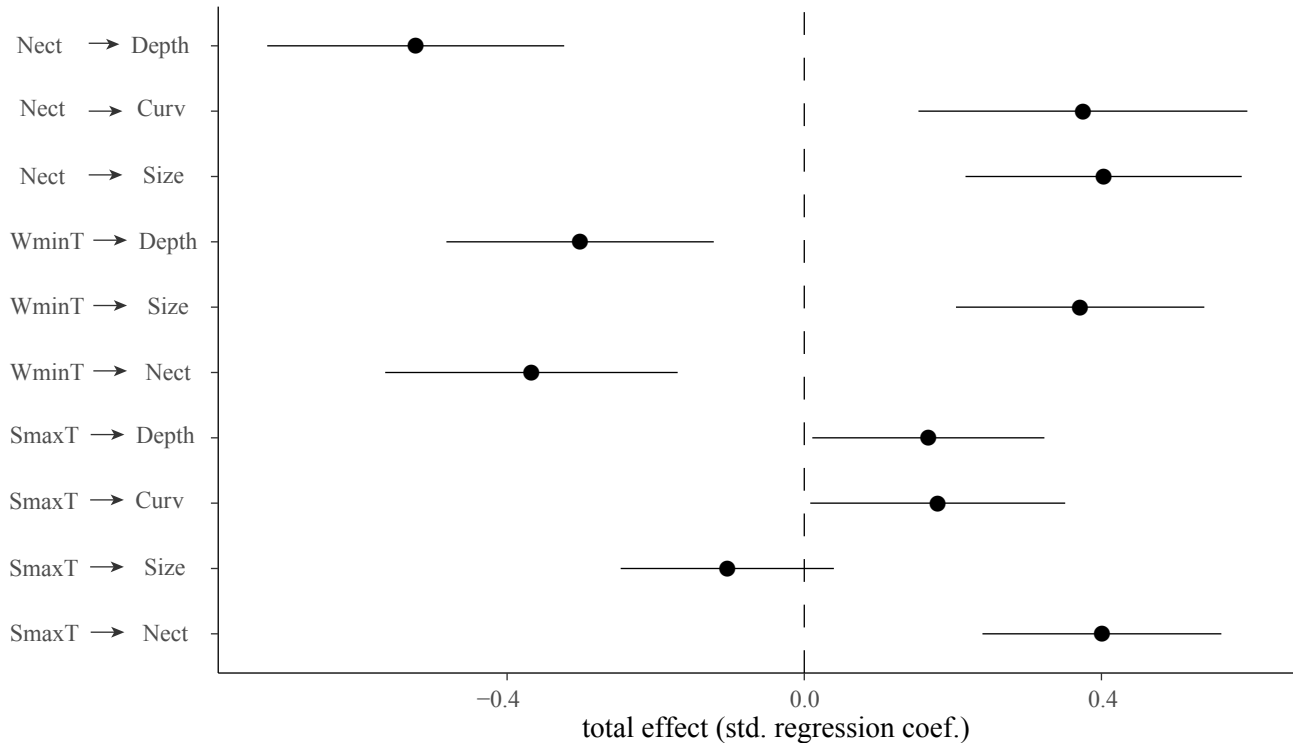

Figure S4: Effect size forest plot for total effect estimates from the phylogenetically-corrected path analysis described in Figure 2e. Error bars describe 95% confidence intervals around standardized regression coefficients. Abbreviations are as follows: Nect, Foraging pPC1; WminT, Winter Minimum Temperature; SmaxT, Summer Maximum Temperature; Depth, Beak Shape PC1; Curve, Beak Shape PC2; Size, Beak Centroid Size.

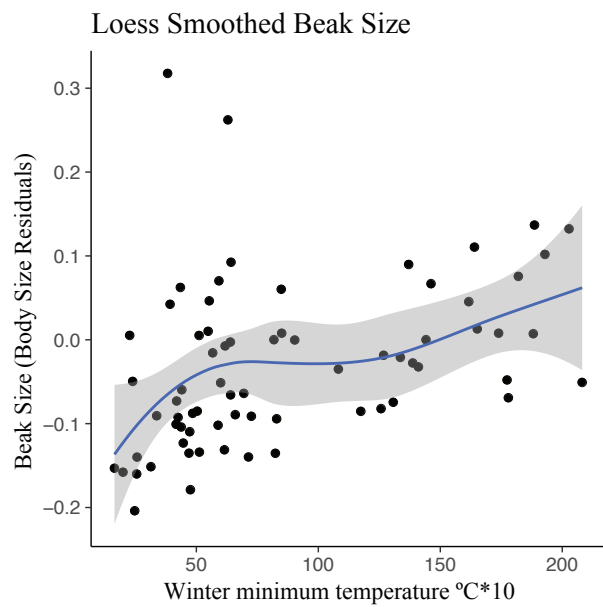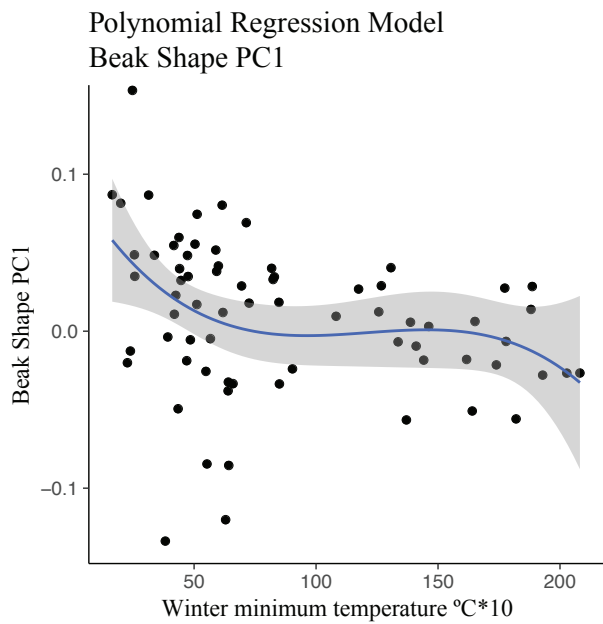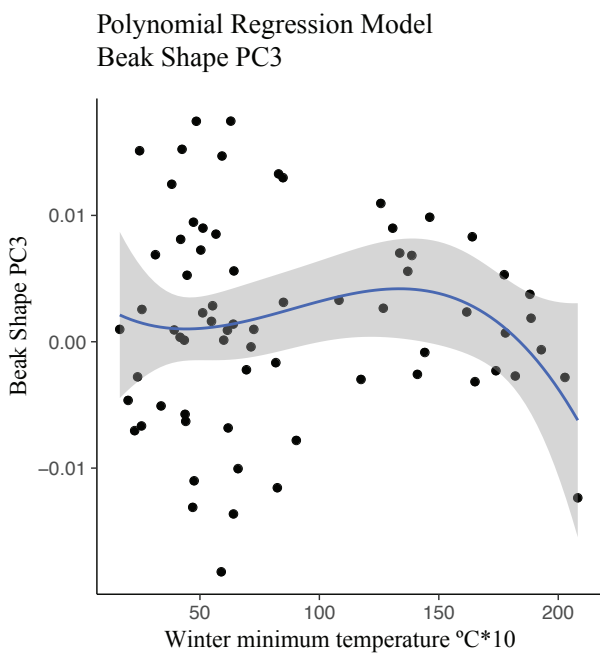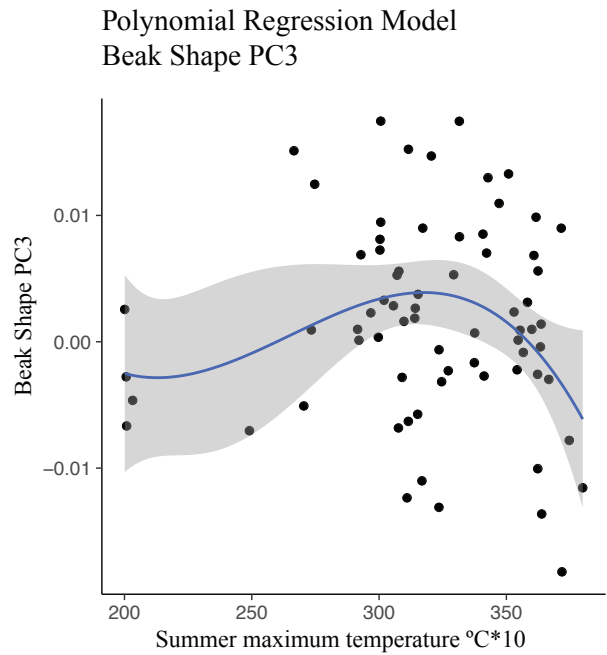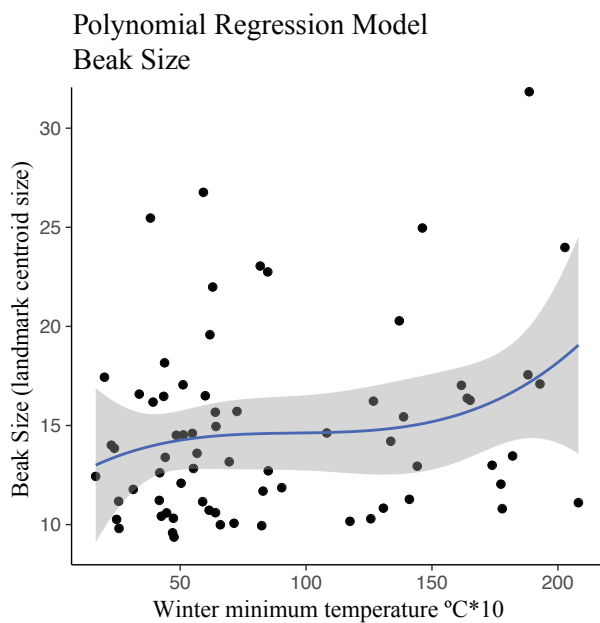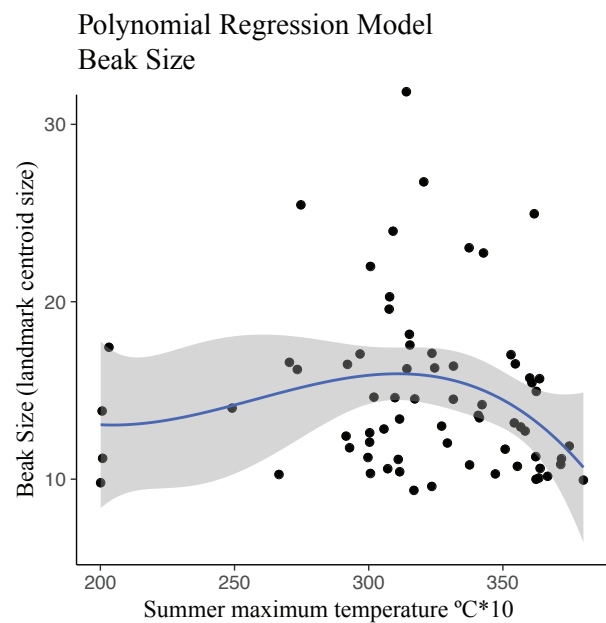

Figure S5: Polynomial regression models for the effect of winter and summer temperatures on beak shape and size. Model fitting was performed in multivariate, phylogenetically corrected framework, and relevant terms of best fitting models are shown here.

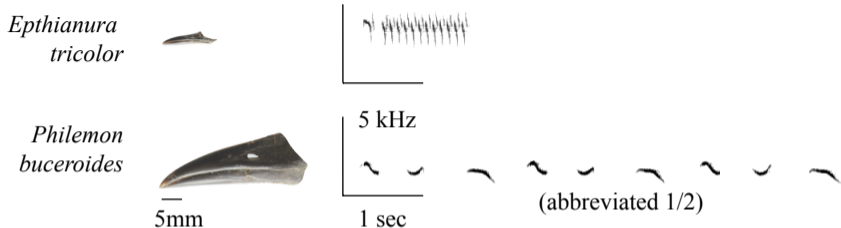

Figure S6: Comparison of extreme beak sizes and the songs those species perform. The Crimson Chat *Epthianura tricolor* is Australia's smallest honeyeater and performs a high trill, whereas the Helmeted Friarbird *Philemon buceroides* is Australia's largest honeyeater and performs a series of long whistles. Scale bars are shown for beak length (mm), time (seconds), and frequency (Hz).

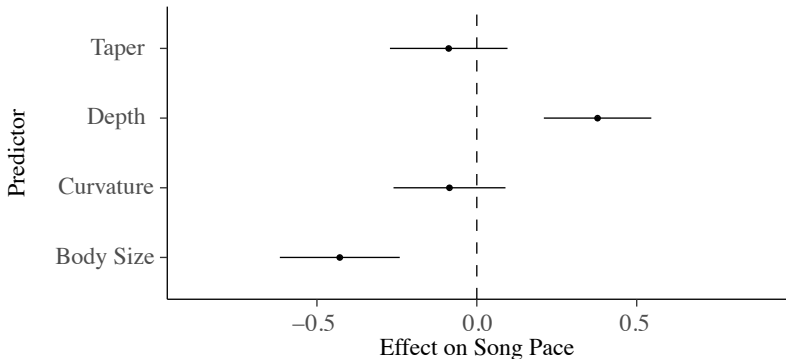

Figure S7: Forest plot for PGLS analysis results describing the effect of beak size and shape on song pace. Since beak size and body size are tightly correlated, we avoided including both as covariates. Here we repeat the analysis described in Figure 4a, panel 1 using body size rather than beak size.

Table S1. PCA loadings of ecological data describing dietary preferences and foraging behavior of honeyeater species, based on observations by ET Miller and SK Wagner (Miller et al. 2017). For each PC axis, descriptions are given for the three factors with the greatest absolute PC loadings. The first four PC axes together account for a cumulative 47% of the total variance.

| <b>PC1</b>  | <b>Loading</b> | <b>PC2</b>    | <b>Loading</b> | <b>PC3</b>   | <b>Loading</b> | <b>PC4</b>   | <b>Loading</b> |
|-------------|----------------|---------------|----------------|--------------|----------------|--------------|----------------|
| Gleaning    | 0.86           | Mean % Canopy | 0.71           | Pulling      | -0.64          | Reaching     | 0.61           |
| Air         | -0.73          | Mean Third    | -0.69          | Gaping       | -0.73          | Woody Fruits | -0.64          |
| Nectarivory | -0.87          | Ground        | -0.93          | Hanging Bark | 0.75           | Insect Cases | -0.68          |



Table S2: Results of multivariate phylogenetic generalized least squares (PGLS) regressions conducted with each beak morphology response variable. Effect sizes and their standard errors are reported in terms of standardized beta regression coefficients.

| Response Variable              | Predictor Variable | Effect Size (std. B) | ES (std. err.) | t value | P value |
|--------------------------------|--------------------|----------------------|----------------|---------|---------|
| <b>Beak PC1</b><br>(Depth)     | Foraging PC1 (17%) | 0.485                | 0.101          | 4.785   | 0.000   |
|                                | Foraging PC2 (13%) | -0.046               | 0.121          | -0.379  | 0.706   |
|                                | Foraging PC3 (10%) | 0.133                | 0.073          | 1.811   | 0.075   |
|                                | Foraging PC4 (8%)  | 0.109                | 0.084          | 1.299   | 0.199   |
|                                | Summer max T       | 0.169                | 0.092          | 1.836   | 0.071   |
|                                | Winter min T       | -0.308               | 0.092          | -3.333  | 0.002   |
|                                | Body Mass          | 0.110                | 0.097          | 1.140   | 0.259   |
| <b>Beak PC2</b><br>(Curvature) | Foraging PC1       | 0.408                | 0.106          | 3.851   | 0.000   |
|                                | Foraging PC2       | -0.114               | 0.124          | -0.919  | 0.362   |
|                                | Foraging PC3       | -0.122               | 0.089          | -1.373  | 0.175   |
|                                | Foraging PC4       | -0.382               | 0.093          | -4.116  | 0.000   |
|                                | Summer max T       | -0.264               | 0.113          | -2.331  | 0.023   |
|                                | Winter min T       | -0.024               | 0.105          | -0.231  | 0.818   |
|                                | Body Mass          | 0.043                | 0.102          | 0.419   | 0.677   |
| <b>Beak PC3</b><br>(Tapering)  | Foraging PC1       | 0.148                | 0.124          | 1.196   | 0.236   |
|                                | Foraging PC2       | 0.442                | 0.146          | 3.020   | 0.004   |
|                                | Foraging PC3       | 0.238                | 0.099          | 2.401   | 0.019   |
|                                | Foraging PC4       | -0.206               | 0.106          | -1.937  | 0.057   |
|                                | Summer max T       | 0.059                | 0.127          | 0.464   | 0.644   |
|                                | Winter min T       | -0.265               | 0.120          | -2.211  | 0.031   |
|                                | Body Mass          | -0.110               | 0.120          | -0.921  | 0.361   |
| <b>Beak Size</b>               | Foraging PC1       | -0.314               | 0.078          | -4.038  | 0.000   |
|                                | Foraging PC2       | -0.033               | 0.095          | -0.345  | 0.731   |
|                                | Foraging PC3       | -0.080               | 0.055          | -1.453  | 0.151   |
|                                | Foraging PC4       | -0.045               | 0.064          | -0.696  | 0.489   |
|                                | Summer max T       | -0.073               | 0.067          | -1.089  | 0.280   |
|                                | Winter min T       | 0.289                | 0.070          | 4.098   | 0.000   |
|                                | Body Mass          | 0.567                | 0.075          | 7.572   | 0.000   |

Table S3: Results of AIC model fit comparisons among multivariate phylogenetic generalized least squares (PGLS) regressions conducted with polynomial temperature

| Response Variable               | Summer max T | Winter min T | delta AIC |
|---------------------------------|--------------|--------------|-----------|
| <b>Beak PC 1</b><br>(Depth)     | Linear       | 3rd Order    | 0.0       |
|                                 | 3rd Order    | 3rd Order    | 2.8       |
|                                 | Linear       | 2nd Order    | 4.1       |
|                                 | 2nd Order    | 2nd Order    | 6.0       |
|                                 | Linear       | Linear       | 9.1       |
|                                 | 2nd Order    | Linear       | 10.3      |
|                                 | 3rd Order    | Linear       | 12.1      |
| <b>Beak PC 2</b><br>(Curvature) | Linear       | Linear       | 0.0       |
|                                 | Linear       | 2nd Order    | 1.2       |
|                                 | 2nd Order    | Linear       | 1.4       |
|                                 | Linear       | 3rd Order    | 2.7       |
|                                 | 3rd Order    | Linear       | 2.7       |
|                                 | 2nd Order    | 2nd Order    | 4.3       |
|                                 | 3rd Order    | 3rd Order    | 5.7       |
| <b>Beak PC 3</b><br>(Tapering)  | 3rd Order    | 3rd Order    | 0.0       |
|                                 | 2nd Order    | 2nd Order    | 2.5       |
|                                 | 2nd Order    | Linear       | 3.8       |
|                                 | 3rd Order    | Linear       | 5.1       |
|                                 | Linear       | 2nd Order    | 5.8       |
|                                 | 3rd Order    | Linear       | 6.4       |
|                                 | Linear       | Linear       | 6.4       |
| <b>Beak Size</b>                | 3rd Order    | 3rd Order    | 0.0       |
|                                 | 3rd Order    | Linear       | 4.7       |
|                                 | 2nd Order    | 2nd Order    | 6.5       |
|                                 | 2nd Order    | Linear       | 7.5       |
|                                 | Linear       | 3rd Order    | 9.9       |
|                                 | Linear       | Linear       | 13.2      |
|                                 | Linear       | 2nd Order    | 14.8      |
